# Supplementary material for: Identifying the diagnostic value of inflammatory genes in intracranial aneurysms based on machine learning
Source: Research Square preprint supplement (doi:10.21203/rs.3.rs-2413862/v1), 2023-01-03
Supplement: Supplementary file 1 [file c93cf04840c68bdab661e3e0.xlsx]

## Sheet: Sheet1
mirnaid	refseqid	genesymbol	duplex	start	end	bindingp	energy	seed	accessibility	au	phylopstem	phylopflank	me	number_of_pairings	binding_region_length	longest_consecutive_pairings	position	validated	TargetScan	miRDB
hsa-miR-130a-3p	NM_000602	SERPINE1	CAGTGCAATGTTAAAAGGGCAT#TGGGGTTTTTCTTTCTTTCTTTTTTGATTTTGCACTGG#((((((((.((((((((((...#.)))))))))).)))))))).	2977	3015	1	-20.6	1	0.0408772	0.574	0	0	-4.99396	18	21	10	3UTR		0	1
hsa-miR-145-5p	NM_000602	SERPINE1	GTCCAGTTTTCCCAGGAATCCCT#TCTGGGACAAAACTGGAG#.(((((((((((((((.......#)))))))..)))))))).	1372	1390	1	-21.3	1	0.000624954	0.485	0	0	-3.79332	15	18	8	3UTR	MIRT006317	1	1
hsa-miR-378a-5p	NM_000602	SERPINE1	CTCCTGACTCCAGGTCCTGTGT#AGGACGGAGTGGGGGGA#(((((.(((((..(((((....#)))))))))).))))).	2414	2431	1	-24.1	0	0.00654283	0.456	0	0	-10.4745	15	17	10	3UTR		0	1
hsa-miR-324-3p	NM_000602	SERPINE1	CCCACTGCCCCAGGTGCTGCTGG#CCTGCGGGACCATCTGGGGCAC#.....(((((((((((((((.((#)).))))...))))))))))).	1621	1643	1	-27.3	0	3.84372e-07	0.338	0	0	-13.6656	17	22	11	3UTR		0	1
hsa-miR-937-5p	NM_000602	SERPINE1	GTGAGTCAGGGTGGGGCTGG#CAGCCGCATTGGTGACTCACT#((((((((.((((.(((((.#))))).))))..)))))))).	2548	2569	1	-28.4	1	1.68929e-05	0.5	0	0	-5.8508	17	21	8	3UTR		0	1
hsa-miR-1236-3p	NM_000602	SERPINE1	CCTCTTCCCCTTGTCTCTCCAG#TGTGAGCAGTGGACACGTGAGGGGGGGGTGGG#(((((((((((((((((((((.#)).)))....)))))....))))))))).)).	2595	2627	1	-22.9	1	0.00286009	0.397	0	0	-3.93757	21	32	9	3UTR		0	1
hsa-miR-1825	NM_000602	SERPINE1	TCCAGTGCCCTCCTCTCC#GAGGGTAGGGCACAAAGATGGAT#(((((((((((.(((((.#))))).))))))).....)))).	2690	2713	1	-23.4	1	0.00619881	0.456	0	0	-7.28438	16	23	7	3UTR		0	1
hsa-miR-2116-3p	NM_000602	SERPINE1	CCTCCCATGCCAAGAACTCCC#TCTTGGTGGGGAGGG#((((((..(((((((......#))))))).)))))).	2107	2122	1	-23.3	0	7.63926e-11	0.5	0	0	-8.02794	13	15	7	3UTR		0	1
hsa-miR-3925-3p	NM_000602	SERPINE1	ACTCCAGTTTTAGTTCTCTTG#GGGACAAAACTGGAGA#.((((((((((.(((((....#))))))))))))))).	1375	1391	1	-18.9	1	0.000801316	0.5	0	0	-7.14013	15	16	15	3UTR		0	1
hsa-miR-4768-5p	NM_000602	SERPINE1	ATTCTCTCTGGATCCCATGGAT#CCATGTACAGGATCCACAGGGGT#..(((((.((((((((((((..#)))))....))))))).))))).	3028	3051	1	-22	0	3.86674e-05	0.515	0	0	-7.27064	17	23	7	3UTR		0	1
hsa-miR-6719-3p	NM_000602	SERPINE1	TCTGACATCAGTGATTCTCCTG#CGGGAGGATTGCTTGAGCCCAGGA#((((...(((((((((((((((#))))))))))))).))...)))).	2737	2761	1	-21.7	0	1.47325e-06	0.426	0	0	-11.5013	19	24	13	3UTR		0	1
hsa-miR-6731-3p	NM_000602	SERPINE1	TCTATTCCCCACTCTCCCCAG#GGGGGGGGTGGGTGAGAGAG#(((.(((((((((((((((..#)))))))))))).)))))).	2615	2635	1	-30.4	0	0.00797923	0.412	0	0	-6.9696	18	20	12	3UTR		0	1
hsa-miR-6809-3p	NM_000602	SERPINE1	CTTCTCTTCTCTCCTTCCCAG#GGGGGGGTGGGTGAGAGAGA#.((((((((((.(((((((..#))))))).))).))))))).	2616	2636	1	-24.4	1	0.00801208	0.426	0	0	-7.14013	17	20	7	3UTR		0	1
hsa-miR-6815-3p	NM_000602	SERPINE1	TGGCTTCTCTTGCACACCCAG#GGGTGGGTGAGAGAGACAGGCAG#((.((((((((((.(((((..#))))).))))))))...)).)).	2620	2643	1	-23.1	0	0.00828074	0.485	0	0	-6.35195	17	23	8	3UTR		0	1
hsa-miR-6828-3p	NM_000602	SERPINE1	ATCTGCTCTCTTGTTCCCAG#GGGGACAGAGACTCAGATG#(((((.((((.(((((((..#)))))))))))..))))).	2426	2445	1	-21.4	0	0.0155081	0.5	0	0	-8.66331	16	19	11	3UTR		0	1
hsa-miR-6833-3p	NM_000602	SERPINE1	TTTCTCTCTCCACTTCCTCAG#CTGTGTGTGAGCAGTGGACACGTGAGGGGGGGGTGGGTGAGAGAGAC#(((((((((((((((((((..#.))))))))))).)))))))).	2590	2637	1	-29	1	0.00755539	0.426	0	0	-3.93757	19	22	11	3UTR		0	1
hsa-miR-6875-3p	NM_000602	SERPINE1	ATTCTTCCTGCCCTGGCTCCAT#GGCACAAAGATGGATGTAATGCACTTTGGGAGGCCAAGGCGGGAGGAT#..((((((((((.((((((((.#.)))..))))).)))))))))).	2698	2746	1	-29.3	1	0.000121976	0.441	0	0	-6.24613	18	23	10	3UTR		0	1
hsa-miR-6880-5p	NM_000602	SERPINE1	TGGTGGAGGAAGAGGGCAGCTC#GCGCCCCTCTTTTTCCCCT#.((.((((((((((((..((..#))..)))))))))))))).	2349	2368	1	-26	0	0.164015	0.441	0	0	-6.82535	16	19	14	3UTR		0	1
hsa-miR-4433b-5p	NM_000602	SERPINE1	ATGTCCCACCCCCACTCCTGT#CAGGGGATCAAAAGGACGGAGTGGGGGGACAGAGACTCAGATGAGGACAG#.(((((((((((((((((.((#.))))))))))))..............)).))))).	2402	2452	1	-28	1	0.00237774	0.529	0	0	-3.79332	19	36	12	3UTR		0	1
hsa-miR-3689a-3p	XM_011538405	SLC11A2	CTGGGAGGTGTGATATCGTGGT#GTCATACACTCCCAGA#((((((((((((((........#))))))).))))))).	2032	2048	1	-22.5	1	0.0320107	0.485	0	0	-4.90607	14	16	7	3UTR	MIRT681890	0	1
hsa-miR-3689b-3p	XM_011538405	SLC11A2	CTGGGAGGTGTGATATTGTGGT#GCTATAAATGTAGGTCAGAGACCCACCCACCTCATAACAGTCATACACTCCCAGA#((((((((((((((.((((((.#.))))))..))))))).))))))).	1993	2048	1	-25.8	1	0.0320107	0.485	0	0	-4.67302	20	25	7	3UTR	MIRT681889	0	1
hsa-miR-3689c	XM_011538405	SLC11A2	CTGGGAGGTGTGATATTGTGGT#GCTATAAATGTAGGTCAGAGACCCACCCACCTCATAACAGTCATACACTCCCAGA#((((((((((((((.((((((.#.))))))..))))))).))))))).	1993	2048	1	-25.8	1	0.0320107	0.485	0	0	-4.67302	20	25	7	3UTR	MIRT681888	0	1
hsa-miR-4529-5p	XM_011538405	SLC11A2	AGGCCATCAGCAGTCCAATGAA#TCATACACTCCCAGAGTTAAACGATTGGCCTCTGATGGCCA#.(((((((((.((.(((((...#.))))).))))))))))).	2033	2074	1	-25.5	1	1.85815e-07	0.485	0	0	-7.47494	16	19	11	3UTR		0	1
hsa-miR-6748-5p	XM_011538405	SLC11A2	TGTGGGTGGGAAGGACTGGATT#GGTCAGAGACCCACCCACC#.(((((((((...((((.....#)))).....))))))))).	2005	2024	1	-22.7	1	0.00725958	0.559	0	0	-11.254	13	19	9	3UTR		0	1
hsa-miR-6769b-5p	XM_011538405	SLC11A2	TGGTGGGTGGGGAGGAGAAGTGC#CCCACCCACCT#.((((((((((............#)))))))))).	2014	2025	1	-23.5	1	0.0108323	0.559	0	0	-10.2546	10	11	10	3UTR		0	1
hsa-miR-3689a-3p	XM_017019356	SLC11A2	CTGGGAGGTGTGATATCGTGGT#GTCATACACTCCCAGA#((((((((((((((........#))))))).))))))).	2238	2254	1	-22.5	1	0.0320107	0.485	0	0	-4.90607	14	16	7	3UTR	MIRT681890	0	1
hsa-miR-3689b-3p	XM_017019356	SLC11A2	CTGGGAGGTGTGATATTGTGGT#GCTATAAATGTAGGTCAGAGACCCACCCACCTCATAACAGTCATACACTCCCAGA#((((((((((((((.((((((.#.))))))..))))))).))))))).	2199	2254	1	-25.8	1	0.0320107	0.485	0	0	-4.67302	20	25	7	3UTR	MIRT681889	0	1
hsa-miR-3689c	XM_017019356	SLC11A2	CTGGGAGGTGTGATATTGTGGT#GCTATAAATGTAGGTCAGAGACCCACCCACCTCATAACAGTCATACACTCCCAGA#((((((((((((((.((((((.#.))))))..))))))).))))))).	2199	2254	1	-25.8	1	0.0320107	0.485	0	0	-4.67302	20	25	7	3UTR	MIRT681888	0	1
hsa-miR-4529-5p	XM_017019356	SLC11A2	AGGCCATCAGCAGTCCAATGAA#TCATACACTCCCAGAGTTAAACGATTGGCCTCTGATGGCCA#.(((((((((.((.(((((...#.))))).))))))))))).	2239	2280	1	-25.5	1	1.85815e-07	0.485	0	0	-7.47494	16	19	11	3UTR		0	1
hsa-miR-6748-5p	XM_017019356	SLC11A2	TGTGGGTGGGAAGGACTGGATT#GGTCAGAGACCCACCCACC#.(((((((((...((((.....#)))).....))))))))).	2211	2230	1	-22.7	1	0.00725958	0.559	0	0	-11.254	13	19	9	3UTR		0	1
hsa-miR-6769b-5p	XM_017019356	SLC11A2	TGGTGGGTGGGGAGGAGAAGTGC#CCCACCCACCT#.((((((((((............#)))))))))).	2220	2231	1	-23.5	1	0.0108323	0.559	0	0	-10.2546	10	11	10	3UTR		0	1
hsa-miR-21-3p	NM_001379446	SLC11A2	CAACACCAGTCGATGGGCTGT#ACGGGATTTCACCATGTTGCCCAGGCTGGTGTTGA#(((((((((((..(((((...#.)))))))))))))))).	3480	3515	1	-28	1	6.44543e-06	0.485	0	0	-8.57351	16	18	16	3UTR		0	1
hsa-miR-30b-3p	NM_001379446	SLC11A2	CTGGGAGGTGGATGTTTACTTC#AACCTCTACCTCCCCGG#(.((((((((((.(((......#))).)))))))))).).	3102	3119	1	-20.3	1	0.030752	0.5	0	0	-6.39038	14	17	10	3UTR	MIRT681891	0	1
hsa-miR-30b-3p	NM_001379446	SLC11A2	CTGGGAGGTGGATGTTTACTTC#GGCCTTGGCCTCCCAA#.((((((((.((.(((......#))).)).)))))))).	3539	3555	1	-18.8	1	0.000140909	0.471	0	0	-6.32496	13	16	8	3UTR	MIRT681891	0	1
hsa-miR-367-3p	NM_001379446	SLC11A2	AATTGCACTTTAGCAATGGTGA#TCTTGCTCTGTTGCCCAGGCTGGAGTGCAGTG#.(((((((((((((...(((((#.)))))...))))))))))))).	3320	3352	1	-24	1	3.23997e-05	0.426	0	0	-4.76182	18	23	13	3UTR		0	1
hsa-miR-383-3p	NM_001379446	SLC11A2	ACAGCACTGCCTGGTCAGA#TTGCCCAGGCTGGTGTTGA#.(((((((((((((.(((.#))).)))))).))))))).	3496	3515	1	-22.9	1	6.44543e-06	0.485	0	0	-4.52877	16	19	7	3UTR		0	1
hsa-miR-423-3p	NM_001379446	SLC11A2	AGCTCGGTCTGAGGCCCCTCAGT#GCTGGGATTACAGGCACCACATTTTTAGTGGAGATGGGGTTTCACCATGTTGGCCAGGCTG#((((.(((((((((((((((...#.)).))))))))).......)))).)))).	3153	3214	1	-24.8	0	0.000155481	0.529	0	0	-8.05661	19	30	9	3UTR	MIRT016685	0	1
hsa-miR-551b-5p	NM_001379446	SLC11A2	GAAATCAAGCGTGGGTGAGACC#TTTCACCCACCTTC#......(((.((((((((((..#))))))))))))).	2964	2978	1	-18	0	0.497008	0.662	0	0	-16.8091	13	14	13	3UTR		0	1
hsa-miR-3158-3p	NM_001379446	SLC11A2	AAGGGCTTCCTCTCTGCAGGAC#TTTTGTAGAGACGGGATTTCACCATGTTGCCCA#..(((((((((((((((((((.#))))))))))).))))............)))).	3470	3503	1	-23.2	1	0.0126309	0.559	0	0	-4.957	19	33	11	3UTR		0	1
hsa-miR-4260	NM_001379446	SLC11A2	CTTGGGGCATGGAGTCCCA#GGGATTTCACCATGTTGCCCAGGC#((((((((((((((((((.#))))))...))))))..)))))).	3482	3506	1	-24.5	1	0.000818443	0.559	0	0	-3.93757	18	24	6	3UTR		0	1
hsa-miR-4284	NM_001379446	SLC11A2	GGGCTCACATCACCCCAT#GGTGTGAGCCA#.((((((((((.......#)))))))))).	3276	3287	1	-19.5	1	0.000249491	0.485	0	0	-10.2546	10	11	10	3UTR		0	1
hsa-miR-3663-5p	NM_001379446	SLC11A2	GCTGGTCTGCGTGGTGCTCGG#CACCATGTTGGCCAGG#.((((((.((((((((.....#)))))))).)))))).	3195	3211	1	-23.1	1	0.000918287	0.529	0	0	-6.10696	14	16	8	3UTR		0	1
hsa-miR-3670	NM_001379446	SLC11A2	AGAGCTCACAGCTGTCCTTCTCTA#GGGATTACAGGTGTGAGCCA#.(.(((((((.((((..((((...#))))..)))).)))))))).	3267	3287	1	-21.2	0	0.000249491	0.485	0	0	-8.40869	16	20	8	3UTR		0	1
hsa-miR-3689a-3p	NM_001379446	SLC11A2	CTGGGAGGTGTGATATCGTGGT#GTCATACACTCCCAGA#((((((((((((((........#))))))).))))))).	2007	2023	1	-22.5	1	0.0320107	0.485	0	0	-4.90607	14	16	7	3UTR	MIRT681890	0	1
hsa-miR-3689b-3p	NM_001379446	SLC11A2	CTGGGAGGTGTGATATTGTGGT#GCTATAAATGTAGGTCAGAGACCCACCCACCTCATAACAGTCATACACTCCCAGA#((((((((((((((.((((((.#.))))))..))))))).))))))).	1968	2023	1	-25.8	1	0.0320107	0.485	0	0	-4.67302	20	25	7	3UTR	MIRT681889	0	1
hsa-miR-3929	NM_001379446	SLC11A2	GAGGCTGATGTGAGTAGACCACT#GGCTGGTCTCAAACTCTTGACCTCAAGTGATCTACCTGCCTCAGCCTCC#((((((((.(((.(((((.((((#.)))).))))).))).)))))))).	3209	3258	1	-27.3	1	0.00788181	0.485	0	0	-6.28309	20	25	8	3UTR	MIRT681913	0	1
hsa-miR-3929	NM_001379446	SLC11A2	GAGGCTGATGTGAGTAGACCACT#AGTAATCTGCTGGCCTTGGCCTCC#((((((((.((.((((((..(((#)))..)))))).)).)))))))).	3528	3552	1	-24.4	1	9.95618e-05	0.485	0	0	-8.34077	19	24	8	3UTR	MIRT681913	0	1
hsa-miR-3934-3p	NM_001379446	SLC11A2	TGCTCAGGTTGCACAGCTGGGA#CCCAGGCTGGAGTGCAGTGGTGTGATCTCAGCTCACTGCAACTTCTGCCACCTGGGCT#.((((((((((((.((((((((#.))))))))...)))).........)))))))).	3333	3391	1	-27.4	1	4.59128e-05	0.456	0	0	-4.65016	20	34	8	3UTR		0	1
hsa-miR-4478	NM_001379446	SLC11A2	GAGGCTGAGCTGAGGAG#CTCCCCGGTTTAATCGATTCTCCTCCTTCAGCCTCC#(((((((((..((((((#.)))))).))))))))).	3111	3147	1	-24.5	1	0.0120414	0.5	0	0	-8.00486	15	18	9	3UTR	MIRT681911	0	1
hsa-miR-3689c	NM_001379446	SLC11A2	CTGGGAGGTGTGATATTGTGGT#GCTATAAATGTAGGTCAGAGACCCACCCACCTCATAACAGTCATACACTCCCAGA#((((((((((((((.((((((.#.))))))..))))))).))))))).	1968	2023	1	-25.8	1	0.0320107	0.485	0	0	-4.67302	20	25	7	3UTR	MIRT681888	0	1
hsa-miR-4524a-5p	NM_001379446	SLC11A2	ATAGCAGCATGAACCTGTCTCA#GAGACGGGATTTCACCATGTTGCC#...((((((((((((((((((.#)))))))).))....)))))))).	3477	3501	1	-23.6	0	0.00966831	0.559	0	0	-6.51454	18	24	8	3UTR		0	1
hsa-miR-4529-5p	NM_001379446	SLC11A2	AGGCCATCAGCAGTCCAATGAA#TCATACACTCCCAGAGTTAAACGATTGGCCTCTGATGGCCA#.(((((((((.((.(((((...#.))))).))))))))))).	2008	2049	1	-25.5	1	1.85815e-07	0.485	0	0	-7.47494	16	19	11	3UTR		0	1
hsa-miR-4655-5p	NM_001379446	SLC11A2	CACCGGGGATGGCAGAGGGTCG#TGACGTGATCTCAGTTCACTGTAACCTCTACCTCCCCGGTT#.((((((((.((.(((((..((#.))...))))).)))))))))).	3080	3121	1	-26.4	1	0.0274193	0.5	0	0	-6.32496	17	23	10	3UTR	MIRT461175	0	1
hsa-miR-4655-5p	NM_001379446	SLC11A2	CACCGGGGATGGCAGAGGGTCG#CTTCTGCCACCTGGGC#..((.(((.(((((((((....#)))))))))))).)).	3374	3390	1	-24.9	0	3.01862e-05	0.441	0	0	-10.1324	14	16	12	3UTR	MIRT461175	0	1
hsa-miR-4701-3p	NM_001379446	SLC11A2	ATGGGTGATGGGTGTGGTGT#CACCACACCCAGCTA#...(((..(((((((((((.#)))))))))))))).	3444	3459	1	-22.8	0	0.0429358	0.544	0	0	-10.3719	14	15	14	3UTR		0	1
hsa-miR-4784	NM_001379446	SLC11A2	TGAGGAGATGCTGGGACTGA#TCCAGCTCACTCCTCAT#(((((((..((((((.....#))))))...))))))).	3586	3603	1	-20.8	1	0.0250117	0.515	0	0	-7.54065	13	17	7	3UTR		0	1
hsa-miR-5195-3p	NM_001379446	SLC11A2	ATCCAGTTCTCTGAGGGGGCT#AGCCTCCTGAATAGCTGGG#..((((((...(.((((((((#)))))))).)..)))))).	3140	3159	1	-22	1	4.53127e-05	0.559	0	0	-11.3698	15	19	8	3UTR		0	1
hsa-miR-6728-5p	NM_001379446	SLC11A2	TTGGGATGGTAGGACCAGAGGGG#CCACCTGGGCTTAAGCCATCCTC#..(((((((((((.((((..((.#))..)))).)))..)))))))).	3380	3403	1	-24.2	1	0.000585341	0.456	0	0	-5.81384	17	23	8	3UTR		0	1
hsa-miR-6733-5p	NM_001379446	SLC11A2	TGGGAAAGACAAACTCAGAGTT#GACTTTGAGCATCACTTTCCCC#.(((((((.....(((((((((#))))))))).....))))))).	3654	3676	1	-20.7	1	0.136647	0.559	0	0	-13.5529	16	22	9	3UTR		0	1
hsa-miR-6748-5p	NM_001379446	SLC11A2	TGTGGGTGGGAAGGACTGGATT#GGTCAGAGACCCACCCACC#.(((((((((...((((.....#)))).....))))))))).	1980	1999	1	-22.7	1	0.00725958	0.559	0	0	-11.254	13	19	9	3UTR		0	1
hsa-miR-6769a-5p	NM_001379446	SLC11A2	AGGTGGGTATGGAGGAGCCCT#GGGCTTAAGCCATCCTCCCACTTC#(((((((.((((..((((((.#))))))...))))...))))))).	3386	3410	1	-24.4	1	0.172198	0.441	0	0	-8.39718	17	24	7	3UTR		0	1
hsa-miR-6769a-5p	NM_001379446	SLC11A2	AGGTGGGTATGGAGGAGCCCT#GGGGTTTCACCATGTTGGCCA#.(((.(((((((.((((((((#)))))))).))))))).))).	3188	3209	1	-23.8	0	0.00279895	0.515	0	0	-9.20149	18	21	8	3UTR		0	1
hsa-miR-6779-5p	NM_001379446	SLC11A2	CTGGGAGGGGCTGGGTTTGGC#GCCACTGCATCCAGCTCACTCCTC#..((((((((((((((.((((#))))....))))))))).))))).	3577	3601	1	-26.3	1	0.0207353	0.515	0	0	-4.957	18	24	9	3UTR	MIRT681887	0	1
hsa-miR-6799-5p	NM_001379446	SLC11A2	GGGGAGGTGTGCAGGGCTGG#TCAGCAAATCCTGCAGCCTTTGTGTGACTTTGAGCATCACTTTCCCC#(((((((((((((((((((.#.))))))).............))).))))))))).	3629	3676	1	-26.3	1	0.136647	0.559	0	0	-3.93757	19	35	9	3UTR	MIRT461161	0	1
hsa-miR-6799-5p	NM_001379446	SLC11A2	GGGGAGGTGTGCAGGGCTGG#TCAGTTCACTGTAACCTCTACCTCCCCG#((((((((((((((((((((#))))))..))))).....))))))))).	3090	3118	1	-26.1	1	0.0313699	0.5	0	0	-3.93757	20	28	9	3UTR	MIRT461161	0	1
hsa-miR-6824-5p	NM_001379446	SLC11A2	GTAGGGGAGGTTGGGCCAGGGA#TCTGCTGGCCTTGGCCTCCCA#....(((((((.((((((((((#))).)))))))..))))))).	3533	3554	1	-29.2	0	7.9184e-05	0.485	0	0	-12.8934	17	21	7	3UTR		0	1
hsa-miR-6824-5p	NM_001379446	SLC11A2	GTAGGGGAGGTTGGGCCAGGGA#CCTGCCTCAGCCTCCCA#....(((((((((((.((((..#)))).))))))))))).	3243	3260	1	-28.8	0	0.00821959	0.471	0	0	-9.77961	15	17	11	3UTR		0	1
hsa-miR-6838-5p	NM_001379446	SLC11A2	AAGCAGCAGTGGCAAGACTCCT#AGGGTCTTGCTCTGTTGCC#..(((((((.((((((((.(((#)))))))))))))))))).	3316	3335	1	-27	1	1.95814e-05	0.485	0	0	-6.19951	18	19	18	3UTR		0	1
hsa-miR-6838-5p	NM_001379446	SLC11A2	AAGCAGCAGTGGCAAGACTCCT#GAGTCTTGCCCTGTCGCC#..((.((((.((((((((((..#)))))))))))))).)).	3047	3065	1	-26.9	0	0.00369893	0.559	0	0	-10.3185	16	18	14	3UTR		0	1
hsa-miR-6843-3p	NM_001379446	SLC11A2	ATGGTCTCCTGTTCTCTGCAG#TTGTAGAGACGGGATTTCACCATG#(((((.(((((.(((((((((#))))))))))))))....))))).	3472	3496	1	-21.9	0	0.00189881	0.588	0	0	-9.18534	19	24	14	3UTR		0	1
hsa-miR-6769b-5p	NM_001379446	SLC11A2	TGGTGGGTGGGGAGGAGAAGTGC#TATAGATTTTTTTTTTCACCCACCT#.((((((((((((((((((....#.)))))))))))))))))).	2951	2976	1	-24.9	1	0.558554	0.662	0	0	-3.79332	18	20	18	3UTR		0	1
hsa-miR-7106-5p	NM_001379446	SLC11A2	TGGGAGGAGGGGATCTTGGG#CCCGGTTTAATCGATTCTCCTCCTTCA#..((((((((((((((((((#))))).......))))).)))))))).	3114	3141	1	-22.5	1	0.122493	0.485	0	0	-4.957	18	27	8	3UTR	MIRT681900	0	1
hsa-miR-1273h-5p	NM_001379446	SLC11A2	CTGGGAGGTCAAGGCTGCAGT#TAATCTGCTGGCCTTGGCCTCCCAA#.(((((((((((((((((((.#.)))).))))))))))))))).	3530	3555	1	-36.7	1	0.000140909	0.471	0	0	-3.79332	19	22	15	3UTR	MIRT681892	0	1
hsa-miR-15a-5p	NM_000617	SLC11A2	TAGCAGCACATAATGGTTTGTG#TGTGCTGCTAC#((((((((((............#)))))))))).	3968	3979	1	-16.8	1	0.0179169	0.662	0	0	-13.2236	10	11	10	3UTR		0	1
hsa-miR-16-5p	NM_000617	SLC11A2	TAGCAGCACGTAAATATTGGCG#TGTGCTGCTAC#((((((((((............#)))))))))).	3968	3979	1	-16.1	1	0.0179169	0.662	0	0	-13.2236	10	11	10	3UTR	MIRT031729	0	1
hsa-miR-21-3p	NM_000617	SLC11A2	CAACACCAGTCGATGGGCTGT#AGAGTCCTGGCTGATTGGTGTTC#.(((((((((((..(((((.(#).)))))....))))))))))).	3201	3224	1	-20.9	1	0.000486922	0.5	0	0	-5.9393	17	23	11	3UTR		0	1
hsa-miR-223-3p	NM_000617	SLC11A2	TGTCAGTTTGTCAAATACCCCA#TGGGATCTTTGAAAAGCTGACAT#(((((((((.(((((...((((#))))...))))).))))))))).	2003	2026	1	-20.8	1	0.0543453	0.618	0	0	-5.41313	18	23	9	3UTR		0	1
hsa-miR-30b-3p	NM_000617	SLC11A2	CTGGGAGGTGGATGTTTACTTC#TAAAGCCACCTCTCAGC#(((((((((((...........#.))))))))))).	2727	2744	1	-20.8	1	0.0130362	0.529	0	0	-10.3988	11	13	11	3UTR	MIRT681891	0	1
hsa-miR-195-5p	NM_000617	SLC11A2	TAGCAGCACAGAAATATTGGC#AATAATTGTGCTGCTAC#(((((((((((..........#.))))))))))).	3962	3979	1	-17.1	1	0.0179169	0.662	0	0	-10.3988	11	13	11	3UTR		0	1
hsa-miR-331-5p	NM_000617	SLC11A2	CTAGGTATGGTCCCAGGGATCC#GGATTTCTTGGGAGTCTTAATAACCTGCCTGT#.((((((.((((((((((((((#))))).)))))))..........)))))))).	2514	2546	1	-21.9	1	0.00156245	0.618	0	0	-6.10696	20	32	8	3UTR		0	1
hsa-miR-1284	NM_000617	SLC11A2	TCTATACAGACCCTGGCTTTTC#AAGATGATATGGTAACATGTATCTTTGCCCTGGGTCTGGGTGGGT#(((((.(((((((.(((.....#.)))..))))))).))))).	3560	3605	1	-22.6	0	1.39997e-05	0.559	0	0	-6.69537	15	20	7	3UTR		0	1
hsa-miR-544b	NM_000617	SLC11A2	ACCTGAGGTTGTGCATTTCTAA#GCAATCTCAGGA#.(((((((((((..........#))))))))))).	2802	2814	1	-17.6	1	0.000707953	0.485	0	0	-6.90779	11	12	11	3UTR		0	1
hsa-miR-3153	NM_000617	SLC11A2	GGGGAAAGCGAGTAGGGACATTT#TCTCTACAGCTGTTTCCTCA#(((((((((..(((((((.....#))))))).)))..)))))).	2928	2948	1	-20	1	0.0101631	0.529	0	0	-8.00486	16	20	7	3UTR		0	1
hsa-miR-3160-3p	NM_000617	SLC11A2	AGAGCTGAGACTAGAAAGCCCA#TGGGTCCAGTCAGTCTCAGA#....((((((((.((..(((((#)))))....)))))))))).	3600	3620	1	-20.2	0	0.00556418	0.515	0	0	-11.0687	15	20	10	3UTR		0	1
hsa-miR-3160-3p	NM_000617	SLC11A2	AGAGCTGAGACTAGAAAGCCCA#TGGGCTACCTCTCTACAGCTG#..((((((((..((..((((((#))))))..)).))).))))).	2919	2940	1	-19.7	1	0.0294415	0.529	0	0	-12.0971	16	21	6	3UTR		0	1
hsa-miR-3184-5p	NM_000617	SLC11A2	TGAGGGGCCTCAGACCGAGCTTTT#GTTCATCTGAGCCCCCAA#((.((((.((((((..((((....#)))).)))))))))))).	3227	3245	1	-22.1	0	0.0115851	0.529	0	0	-8.77725	16	18	12	3UTR		0	1
hsa-miR-4283	NM_000617	SLC11A2	TGGGGCTCAGCGAGTTT#TTCATCTGAGCCCCC#.(((((((((.(((...#)))..))))))))).	3228	3243	1	-19.5	1	0.00412182	0.529	0	0	-7.5866	12	15	9	3UTR		0	1
hsa-miR-4487	NM_000617	SLC11A2	AGAGCTGGCTGAAGGGCAG#TTGCCCAAGGGCCAGCTCA#.(((((((((...((((((#))))))...))))))))).	2062	2081	1	-28.8	1	0.00027297	0.559	0	0	-11.254	15	19	9	3UTR		0	1
hsa-miR-4711-5p	NM_000617	SLC11A2	TGCATCAGGCCAGAAGACATGAG#TCATGTTTTTCTGATGCAC#((((((((....((((((((((.#)))))))))))))))))).	2751	2770	1	-21.4	1	0.00326271	0.485	0	0	-12.408	18	19	18	3UTR		0	1
hsa-miR-4728-5p	NM_000617	SLC11A2	TGGGAGGGGAGAGGCAGCAAGCA#TGAATGACAATTCCCCTAACCATTCCTCTTCATATCTGCCTCTTCCCCTTACCAT#(((((((((((((((((......#.)))))))).)))))).))).	3385	3440	1	-29	1	0.276634	0.574	0	0	-3.93757	17	21	8	3UTR	MIRT681898	0	1
hsa-miR-6071	NM_000617	SLC11A2	TTCTGCTGCCGGCCAAGGC#CCTGGCTGCAGTAGGAA#((((((((.(((((.(((.#)))))))))))))))).	3508	3525	1	-22.7	1	0.000148278	0.559	0	0	-5.72941	16	17	16	3UTR		0	1
hsa-miR-6508-5p	NM_000617	SLC11A2	TCTAGAAATGCATGACCCACC#GGTGGGTCCAGTCAGTCTCAGAT#((((((...((..((((((((#))))))))..))...))).))).	3598	3621	1	-19.9	0	0.00768497	0.5	0	0	-13.4872	16	23	8	3UTR		0	1
hsa-miR-6513-5p	NM_000617	SLC11A2	TTTGGGATTGACGCCACATGTCT#ACATGTATCTTTGCCCTGGGTCTGGGTGGGTCCAGTCAGTCTCAGAT#(((((((((((((((.(((.(..#.).))))))...)))))))))))).	3574	3621	1	-20.5	1	0.00768497	0.5	0	0	-4.17062	19	25	12	3UTR	MIRT681881	0	1
hsa-miR-6734-5p	NM_000617	SLC11A2	TTGAGGGGAGAATGAGGTGGAGA#TTCCTCTTCATATCTGCCTCTTCCCCTTAC#.(((((((((...((((((((..#.))))))))))))))))).	3407	3437	1	-24.5	1	0.298518	0.559	0	0	-11.254	17	19	17	3UTR		0	1
hsa-miR-6736-5p	NM_000617	SLC11A2	CTGGGTGAGGGCATCTGTGGT#GCTCTCACCTGGC#((((((((((((.........#)))))))))))).	3501	3514	1	-21	1	0.00345844	0.515	0	0	-7.05204	12	13	12	3UTR		0	1
hsa-miR-6756-3p	NM_000617	SLC11A2	TCCCCTTCCTCCCTGCCCAG#GGGTGGGGAGAAAAGACTTTAAGGGAGGAGAG#((.(((((((((((((((..#))))))))).............)))))).)).	2679	2711	1	-25.7	0	0.0311218	0.544	0	0	-5.49511	17	32	9	3UTR		0	1
hsa-miR-6756-3p	NM_000617	SLC11A2	TCCCCTTCCTCCCTGCCCAG#GGGTGAGAAAACAAAGAAGGGGAA#(((((((((((...((((..#)))))))........)))))))).	2399	2423	1	-20.8	1	0.470703	0.574	0	0	-9.43035	15	24	8	3UTR		0	1
hsa-miR-6780a-5p	NM_000617	SLC11A2	TTGGGAGGGAAGACAGCTGGAGA#TCTCTACAGCTGTTTCCTCA#....(((((..((((((((((((#))))..))))))))))))).	2928	2948	1	-21.7	0	0.0101631	0.529	0	0	-13.6138	17	20	13	3UTR	MIRT681886	0	1
hsa-miR-6824-5p	NM_000617	SLC11A2	GTAGGGGAGGTTGGGCCAGGGA#CTGGGCTACCTCTCTACA#(((.((((((.(((.((((...#)))).)))))))))))).	2918	2936	1	-23.4	0	0.00420776	0.529	0	0	-10.5298	16	18	12	3UTR		0	1
hsa-miR-6769b-5p	NM_000617	SLC11A2	TGGTGGGTGGGGAGGAGAAGTGC#TTTTTCCTTCCTGACCTAACCT#.(((((((((((((((((((...#)))))))))))).))))).)).	1965	1987	1	-24.1	1	0.002679	0.632	0	0	-3.79332	19	22	12	3UTR		0	1
hsa-miR-6862-5p	NM_000617	SLC11A2	CGGGCATGCTGGGAGAGACTTT#GTCTTTCTCAGCGTTCTCT#.(((.((((((((((((((...#)))))))))))))).))).	2844	2863	1	-25.9	0	0.00174383	0.544	0	0	-7.91236	17	19	14	3UTR		0	1
hsa-miR-6862-5p	NM_000617	SLC11A2	CGGGCATGCTGGGAGAGACTTT#AAGTCCTCCAATTCCAGCATATCCA#.(((.((((((((((.(((((.#))))))))).....)))))).))).	3844	3869	1	-21.6	0	0.00997069	0.647	0	0	-8.14541	18	25	9	3UTR		0	1
hsa-miR-6862-5p	NM_000617	SLC11A2	CGGGCATGCTGGGAGAGACTTT#CTCTGCTTCATGCCCA#.(((((((..((.((((.....#)))).)).))))))).	2772	2788	1	-21.7	1	0.000135046	0.485	0	0	-7.38135	13	16	7	3UTR		0	1
hsa-miR-6895-3p	NM_000617	SLC11A2	TGTCTCTCGCCCTTGGCCTTAG#CTAAATTCTTAAGTAGTTGCCCAAGGGCCAGCTCAGTTTATCCTTCGGAGAGACAA#((((((((((((((((......#.))))))))...................)))))))).	2046	2102	1	-25.4	1	8.27973e-05	0.529	0	0	-3.93757	16	37	8	3UTR		0	1
hsa-miR-1273h-5p	NM_000617	SLC11A2	CTGGGAGGTCAAGGCTGCAGT#TTGGAGCTTTCCTTCCAGA#((((((((..((((((.(((.#))).)))))))))))))).	3185	3204	1	-22.7	1	0.000121638	0.544	0	0	-6.23647	17	19	14	3UTR	MIRT681892	0	1
hsa-miR-15a-5p	NM_001174125	SLC11A2	TAGCAGCACATAATGGTTTGTG#TGTGCTGCTAC#((((((((((............#)))))))))).	3959	3970	1	-16.8	1	0.0179169	0.662	0	0	-13.2236	10	11	10	3UTR		0	1
hsa-miR-16-5p	NM_001174125	SLC11A2	TAGCAGCACGTAAATATTGGCG#TGTGCTGCTAC#((((((((((............#)))))))))).	3959	3970	1	-16.1	1	0.0179169	0.662	0	0	-13.2236	10	11	10	3UTR	MIRT031729	0	1
hsa-miR-21-3p	NM_001174125	SLC11A2	CAACACCAGTCGATGGGCTGT#AGAGTCCTGGCTGATTGGTGTTC#.(((((((((((..(((((.(#).)))))....))))))))))).	3192	3215	1	-20.9	1	0.000486922	0.5	0	0	-5.9393	17	23	11	3UTR		0	1
hsa-miR-223-3p	NM_001174125	SLC11A2	TGTCAGTTTGTCAAATACCCCA#TGGGATCTTTGAAAAGCTGACAT#(((((((((.(((((...((((#))))...))))).))))))))).	1994	2017	1	-20.8	1	0.0543453	0.618	0	0	-5.41313	18	23	9	3UTR		0	1
hsa-miR-30b-3p	NM_001174125	SLC11A2	CTGGGAGGTGGATGTTTACTTC#TAAAGCCACCTCTCAGC#(((((((((((...........#.))))))))))).	2718	2735	1	-20.8	1	0.0130362	0.529	0	0	-10.3988	11	13	11	3UTR	MIRT681891	0	1
hsa-miR-195-5p	NM_001174125	SLC11A2	TAGCAGCACAGAAATATTGGC#AATAATTGTGCTGCTAC#(((((((((((..........#.))))))))))).	3953	3970	1	-17.1	1	0.0179169	0.662	0	0	-10.3988	11	13	11	3UTR		0	1
hsa-miR-331-5p	NM_001174125	SLC11A2	CTAGGTATGGTCCCAGGGATCC#GGATTTCTTGGGAGTCTTAATAACCTGCCTGT#.((((((.((((((((((((((#))))).)))))))..........)))))))).	2505	2537	1	-21.9	1	0.00156245	0.618	0	0	-6.10696	20	32	8	3UTR		0	1
hsa-miR-1200	NM_001174125	SLC11A2	CTCCTGAGCCATTCTGAGCCTC#GCTCTATCAGGCTTAGGAT#.(((((((((.....((((...#)))).....))))))))).	2326	2345	1	-21.9	1	0.00490993	0.676	0	0	-12.8463	13	19	9	3UTR		0	1
hsa-miR-1284	NM_001174125	SLC11A2	TCTATACAGACCCTGGCTTTTC#AAGATGATATGGTAACATGTATCTTTGCCCTGGGTCTGGGTGGGT#(((((.(((((((.(((.....#.)))..))))))).))))).	3551	3596	1	-22.6	0	1.39997e-05	0.559	0	0	-6.69537	15	20	7	3UTR		0	1
hsa-miR-544b	NM_001174125	SLC11A2	ACCTGAGGTTGTGCATTTCTAA#GCAATCTCAGGA#.(((((((((((..........#))))))))))).	2793	2805	1	-17.6	1	0.000707953	0.485	0	0	-6.90779	11	12	11	3UTR		0	1
hsa-miR-3153	NM_001174125	SLC11A2	GGGGAAAGCGAGTAGGGACATTT#TCTCTACAGCTGTTTCCTCA#(((((((((..(((((((.....#))))))).)))..)))))).	2919	2939	1	-20	1	0.0101631	0.529	0	0	-8.00486	16	20	7	3UTR		0	1
hsa-miR-3160-3p	NM_001174125	SLC11A2	AGAGCTGAGACTAGAAAGCCCA#TGGGTCCAGTCAGTCTCAGA#....((((((((.((..(((((#)))))....)))))))))).	3591	3611	1	-20.2	0	0.00556418	0.515	0	0	-11.0687	15	20	10	3UTR		0	1
hsa-miR-3160-3p	NM_001174125	SLC11A2	AGAGCTGAGACTAGAAAGCCCA#TGGGCTACCTCTCTACAGCTG#..((((((((..((..((((((#))))))..)).))).))))).	2910	2931	1	-19.7	1	0.0294415	0.529	0	0	-12.0971	16	21	6	3UTR		0	1
hsa-miR-3184-5p	NM_001174125	SLC11A2	TGAGGGGCCTCAGACCGAGCTTTT#GTTCATCTGAGCCCCCAA#((.((((.((((((..((((....#)))).)))))))))))).	3218	3236	1	-22.1	0	0.0115851	0.529	0	0	-8.77725	16	18	12	3UTR		0	1
hsa-miR-4283	NM_001174125	SLC11A2	TGGGGCTCAGCGAGTTT#TTCATCTGAGCCCCC#.(((((((((.(((...#)))..))))))))).	3219	3234	1	-19.5	1	0.00412182	0.529	0	0	-7.5866	12	15	9	3UTR		0	1
hsa-miR-3663-5p	NM_001174125	SLC11A2	GCTGGTCTGCGTGGTGCTCGG#GCACACAGTCAAAAGCGCAGACTGGA#.((((((((((((((((....#)))).)........))))))))))).	3256	3282	1	-21.4	1	0.0086022	0.588	0	0	-3.79332	16	26	11	3UTR		0	1
hsa-miR-4487	NM_001174125	SLC11A2	AGAGCTGGCTGAAGGGCAG#TTGCCCAAGGGCCAGCTCA#.(((((((((...((((((#))))))...))))))))).	2053	2072	1	-28.8	1	0.00027297	0.559	0	0	-11.254	15	19	9	3UTR		0	1
hsa-miR-4711-5p	NM_001174125	SLC11A2	TGCATCAGGCCAGAAGACATGAG#TCATGTTTTTCTGATGCAC#((((((((....((((((((((.#)))))))))))))))))).	2742	2761	1	-21.4	1	0.00326271	0.485	0	0	-12.408	18	19	18	3UTR		0	1
hsa-miR-4728-5p	NM_001174125	SLC11A2	TGGGAGGGGAGAGGCAGCAAGCA#TGAATGACAATTCCCCTAACCATTCCTCTTCATATCTGCCTCTTCCCCTTACCAT#(((((((((((((((((......#.)))))))).)))))).))).	3376	3431	1	-29	1	0.276634	0.574	0	0	-3.93757	17	21	8	3UTR	MIRT681898	0	1
hsa-miR-6071	NM_001174125	SLC11A2	TTCTGCTGCCGGCCAAGGC#GCTCTCACCTGGCTGCAGTAGGAA#((((((((.(((((.(((.#.)))))))))))))))).	3492	3516	1	-23.4	1	0.000148278	0.559	0	0	-5.72941	16	18	16	3UTR		0	1
hsa-miR-6508-5p	NM_001174125	SLC11A2	TCTAGAAATGCATGACCCACC#GGTGGGTCCAGTCAGTCTCAGAT#((((((...((..((((((((#))))))))..))...))).))).	3589	3612	1	-19.9	0	0.00768497	0.5	0	0	-13.4872	16	23	8	3UTR		0	1
hsa-miR-6513-5p	NM_001174125	SLC11A2	TTTGGGATTGACGCCACATGTCT#ACATGTATCTTTGCCCTGGGTCTGGGTGGGTCCAGTCAGTCTCAGAT#(((((((((((((((.(((.(..#.).))))))...)))))))))))).	3565	3612	1	-20.5	1	0.00768497	0.5	0	0	-4.17062	19	25	12	3UTR	MIRT681881	0	1
hsa-miR-6734-5p	NM_001174125	SLC11A2	TTGAGGGGAGAATGAGGTGGAGA#TTCCTCTTCATATCTGCCTCTTCCCCTTAC#.(((((((((...((((((((..#.))))))))))))))))).	3398	3428	1	-24.5	1	0.298518	0.559	0	0	-11.254	17	19	17	3UTR		0	1
hsa-miR-6736-5p	NM_001174125	SLC11A2	CTGGGTGAGGGCATCTGTGGT#GCTCTCACCTGGC#((((((((((((.........#)))))))))))).	3492	3505	1	-21	1	0.00345844	0.515	0	0	-7.05204	12	13	12	3UTR		0	1
hsa-miR-6756-3p	NM_001174125	SLC11A2	TCCCCTTCCTCCCTGCCCAG#CTCGTGAAATGTTGAGGGTGGGGAGAAAAGACTTTAAGGGAGGAGAG#((.(((((((((((((((..#.))))))))).............)))))).)).	2655	2702	1	-25.5	0	0.0311218	0.544	0	0	-5.49511	17	33	9	3UTR		0	1
hsa-miR-6756-3p	NM_001174125	SLC11A2	TCCCCTTCCTCCCTGCCCAG#GGGTGAGAAAACAAAGAAGGGGAA#(((((((((((...((((..#)))))))........)))))))).	2390	2414	1	-20.8	1	0.470703	0.574	0	0	-9.43035	15	24	8	3UTR		0	1
hsa-miR-6780a-5p	NM_001174125	SLC11A2	TTGGGAGGGAAGACAGCTGGAGA#TCTCTACAGCTGTTTCCTCA#....(((((..((((((((((((#))))..))))))))))))).	2919	2939	1	-21.7	0	0.0101631	0.529	0	0	-13.6138	17	20	13	3UTR	MIRT681886	0	1
hsa-miR-6824-5p	NM_001174125	SLC11A2	GTAGGGGAGGTTGGGCCAGGGA#CTGGGCTACCTCTCTACA#(((.((((((.(((.((((...#)))).)))))))))))).	2909	2927	1	-23.4	0	0.00420776	0.529	0	0	-10.5298	16	18	12	3UTR		0	1
hsa-miR-6827-5p	NM_001174125	SLC11A2	TGGGAGCCATGAGGGTCTGTGC#GCACAGACTGTGTTTATGACTCAACCGT#((((((.(((((((((((((((#)))))))))...)))))).)))..))).	1881	1909	1	-22.4	0	0.0214354	0.588	0	0	-5.48126	21	28	9	3UTR		0	1
hsa-miR-6769b-5p	NM_001174125	SLC11A2	TGGTGGGTGGGGAGGAGAAGTGC#TTTTTCCTTCCTGACCTAACCT#.(((((((((((((((((((...#)))))))))))).))))).)).	1956	1978	1	-24.1	1	0.002679	0.632	0	0	-3.79332	19	22	12	3UTR		0	1
hsa-miR-6862-5p	NM_001174125	SLC11A2	CGGGCATGCTGGGAGAGACTTT#GTCTTTCTCAGCGTTCTCT#.(((.((((((((((((((...#)))))))))))))).))).	2835	2854	1	-25.9	0	0.00174383	0.544	0	0	-7.91236	17	19	14	3UTR		0	1
hsa-miR-6862-5p	NM_001174125	SLC11A2	CGGGCATGCTGGGAGAGACTTT#AAGTCCTCCAATTCCAGCATATCCA#.(((.((((((((((.(((((.#))))))))).....)))))).))).	3835	3860	1	-21.6	0	0.00997069	0.647	0	0	-8.14541	18	25	9	3UTR		0	1
hsa-miR-6862-5p	NM_001174125	SLC11A2	CGGGCATGCTGGGAGAGACTTT#CTCTGCTTCATGCCCA#.(((((((..((.((((.....#)))).)).))))))).	2763	2779	1	-21.7	1	0.000135046	0.485	0	0	-7.38135	13	16	7	3UTR		0	1
hsa-miR-6895-3p	NM_001174125	SLC11A2	TGTCTCTCGCCCTTGGCCTTAG#CTAAATTCTTAAGTAGTTGCCCAAGGGCCAGCTCAGTTTATCCTTCGGAGAGACAA#((((((((((((((((......#.))))))))...................)))))))).	2037	2093	1	-25.4	1	8.27973e-05	0.529	0	0	-3.93757	16	37	8	3UTR		0	1
hsa-miR-1273h-5p	NM_001174125	SLC11A2	CTGGGAGGTCAAGGCTGCAGT#TTGGAGCTTTCCTTCCAGA#((((((((..((((((.(((.#))).)))))))))))))).	3176	3195	1	-22.7	1	0.000121638	0.544	0	0	-6.23647	17	19	14	3UTR	MIRT681892	0	1
hsa-miR-16-5p	NM_001174126	SLC11A2	TAGCAGCACGTAAATATTGGCG#CCAGTGATCAGTTTTCCGTGCTGCA#..((((((((.(((((((((..#))))))......))).)))))))).	2588	2613	1	-19.1	1	0.00327624	0.574	3.06192	3.18442	-7.78178	17	25	8	3UTR	MIRT031729	0	1
hsa-miR-223-3p	NM_001174126	SLC11A2	TGTCAGTTTGTCAAATACCCCA#TGGGAAGGGTGTTCAAAACTGACAG#(((((((((....(((((((..#.)))))))..))))))))).	1953	1978	1	-20.6	1	0.00122284	0.544	2.08841	1.57133	-12.6408	16	20	9	3UTR		0	1
hsa-miR-30b-3p	NM_001174126	SLC11A2	CTGGGAGGTGGATGTTTACTTC#GGCCTTGGCCTCCCAA#.((((((((.((.(((......#))).)).)))))))).	3548	3564	1	-18.8	1	0.000140909	0.471	1.51626	1.07399	-6.32496	13	16	8	3UTR	MIRT681891	0	1
hsa-miR-141-3p	NM_001174126	SLC11A2	TAACACTGTCTGGTAAAGATGG#CCATGTTGCCCAGGCTGGTGTTGA#(((((((((((((..((.((((#)))).))..)))))).))))))).	3500	3524	1	-22.5	1	6.44543e-06	0.485	1.6746	1.73841	-5.52986	19	24	7	3UTR		0	1
hsa-miR-377-3p	NM_001174126	SLC11A2	ATCACACAAAGGCAACTTTTGT#GCAAATCCTGCAGCCTTTGTGTGAC#.((((((((((((.........#.)))))))))))).	3641	3666	1	-21.2	1	0.00331142	0.544	1.8075	1.13056	-5.61866	12	14	12	3UTR		0	1
hsa-miR-383-3p	NM_001174126	SLC11A2	ACAGCACTGCCTGGTCAGA#TTGCCCAGGCTGGTGTTGA#.(((((((((((((.(((.#))).)))))).))))))).	3505	3524	1	-22.9	1	6.44543e-06	0.485	1.6746	1.73841	-4.52877	16	19	7	3UTR		0	1
hsa-miR-3158-3p	NM_001174126	SLC11A2	AAGGGCTTCCTCTCTGCAGGAC#TTTTGTAGAGACGGGATTTCACCATGTTGCCCA#..(((((((((((((((((((.#))))))))))).))))............)))).	3479	3512	1	-23.2	1	0.0126309	0.559	2.68112	2.83893	-4.957	19	33	11	3UTR		0	1
hsa-miR-3160-3p	NM_001174126	SLC11A2	AGAGCTGAGACTAGAAAGCCCA#TGGGCTTGTGTCTTGGACTCTG#(((((((((((....(((((((#)))))))..))))))).)))).	2068	2090	1	-24.4	1	0.000477198	0.618	3.42468	2.93419	-10.1658	18	22	7	3UTR		0	1
hsa-miR-4284	NM_001174126	SLC11A2	GGGCTCACATCACCCCAT#GGTGTGAGCCA#.((((((((((.......#)))))))))).	3285	3296	1	-19.5	1	0.000249491	0.485	5.04147	4.46468	-10.2546	10	11	10	3UTR		0	1
hsa-miR-3689b-3p	NM_001174126	SLC11A2	CTGGGAGGTGTGATATTGTGGT#GCTATAAATGTAGGTCAGAGACCCACCCACCTCATAACAGTCATACACTCCCAGA#((((((((((((((.((((((.#.))))))..))))))).))))))).	1977	2032	1	-25.8	1	0.0320107	0.485	2.80929	2.33791	-4.67302	20	25	7	3UTR	MIRT681889	0	1
hsa-miR-4455	NM_001174126	SLC11A2	AGGGTGTGTGTGTTTTT#GGCCACACACCCC#.(((((((((.(((...#)))))))))))).	2053	2066	1	-18.5	1	1.11848e-05	0.471	3.98195	3.18022	-7.5866	12	13	12	3UTR		0	1
hsa-miR-4478	NM_001174126	SLC11A2	GAGGCTGAGCTGAGGAG#CTCCCCGGTTTAATCGATTCTCCTCCTTCAGCCTCC#(((((((((..((((((#.)))))).))))))))).	3120	3156	1	-24.5	1	0.0120414	0.5	4.41171	5.01745	-8.00486	15	18	9	3UTR	MIRT681911	0	1
hsa-miR-3689c	NM_001174126	SLC11A2	CTGGGAGGTGTGATATTGTGGT#GCTATAAATGTAGGTCAGAGACCCACCCACCTCATAACAGTCATACACTCCCAGA#((((((((((((((.((((((.#.))))))..))))))).))))))).	1977	2032	1	-25.8	1	0.0320107	0.485	2.80929	2.33791	-4.67302	20	25	7	3UTR	MIRT681888	0	1
hsa-miR-4524a-5p	NM_001174126	SLC11A2	ATAGCAGCATGAACCTGTCTCA#GAGACGGGATTTCACCATGTTGCC#...((((((((((((((((((.#)))))))).))....)))))))).	3486	3510	1	-23.6	0	0.00966831	0.559	3.07284	2.30599	-6.51454	18	24	8	3UTR		0	1
hsa-miR-4529-5p	NM_001174126	SLC11A2	AGGCCATCAGCAGTCCAATGAA#TCATACACTCCCAGAGTTAAACGATTGGCCTCTGATGGCCA#.(((((((((.((.(((((...#.))))).))))))))))).	2017	2058	1	-25.5	1	1.85815e-07	0.485	3.1522	3.33179	-7.47494	16	19	11	3UTR		0	1
hsa-miR-4677-5p	NM_001174126	SLC11A2	TTGTTCTTTGGTCTTTCAGCCA#CTGAGAGACTCTATAAGAACAT#.(((((((.((((((((((...#))))))))))....))))))).	1828	1850	1	-19.3	1	0.0211101	0.574	1.83856	1.23724	-4.84971	17	22	10	3UTR		0	1
hsa-miR-4701-3p	NM_001174126	SLC11A2	ATGGGTGATGGGTGTGGTGT#CACCACACCCAGCTA#...(((..(((((((((((.#)))))))))))))).	3453	3468	1	-22.8	0	0.0429358	0.544	4.43036	4.37871	-10.3719	14	15	14	3UTR		0	1
hsa-miR-4701-3p	NM_001174126	SLC11A2	ATGGGTGATGGGTGTGGTGT#CACTGCATCCAGCTCACTCC#..(((((((((((((((((.#)))))))))))..)))))).	3588	3608	1	-22.8	1	0.0130539	0.515	1.45453	1.23574	-4.957	17	20	11	3UTR		0	1
hsa-miR-4728-5p	NM_001174126	SLC11A2	TGGGAGGGGAGAGGCAGCAAGCA#TGCTGGCCTTGGCCTCCCAA#(((((((...(((((((((....#))))).))))..))))))).	3544	3564	1	-27.5	1	0.000140909	0.471	0.588679	1.4786	-8.55011	16	20	7	3UTR	MIRT681898	0	1
hsa-miR-4524b-5p	NM_001174126	SLC11A2	ATAGCAGCATAAGCCTGTCTC#GAGACGGGATTTCACCATGTTGCC#...((((((((((((((((((#)))))))).)))....))))))).	3486	3510	1	-20.2	0	0.00966831	0.559	3.07284	2.30599	-6.51454	18	24	8	3UTR		0	1
hsa-miR-6733-5p	NM_001174126	SLC11A2	TGGGAAAGACAAACTCAGAGTT#GACTTTGAGCATCACTTTCCCC#.(((((((.....(((((((((#))))))))).....))))))).	3663	3685	1	-20.7	1	0.136647	0.559	-0.191661	1.02246	-13.5529	16	22	9	3UTR		0	1
hsa-miR-6779-5p	NM_001174126	SLC11A2	CTGGGAGGGGCTGGGTTTGGC#GCCACTGCATCCAGCTCACTCCTC#..((((((((((((((.((((#))))....))))))))).))))).	3586	3610	1	-26.3	1	0.0207353	0.515	1.66476	1.24021	-4.957	18	24	9	3UTR	MIRT681887	0	1
hsa-miR-6799-5p	NM_001174126	SLC11A2	GGGGAGGTGTGCAGGGCTGG#TCAGCAAATCCTGCAGCCTTTGTGTGACTTTGAGCATCACTTTCCCC#(((((((((((((((((((.#.))))))).............))).))))))))).	3638	3685	1	-26.3	1	0.136647	0.559	0.909717	0.973742	-3.93757	19	35	9	3UTR	MIRT461161	0	1
hsa-miR-6799-5p	NM_001174126	SLC11A2	GGGGAGGTGTGCAGGGCTGG#TCAGTTCACTGTAACCTCTACCTCCCCG#((((((((((((((((((((#))))))..))))).....))))))))).	3099	3127	1	-26.1	1	0.0313699	0.5	3.71901	5.2706	-3.93757	20	28	9	3UTR	MIRT461161	0	1
hsa-miR-6827-5p	NM_001174126	SLC11A2	TGGGAGCCATGAGGGTCTGTGC#GCCCAGGCTGGTGTTGAACTCATGAGCTCA#...((((((((((((((((.((#)).)))))).........)))))).)))).	3507	3537	1	-22.3	0	0.0119936	0.456	0.914484	1.80976	-6.51454	18	30	6	3UTR		0	1
hsa-miR-1273h-5p	NM_001174126	SLC11A2	CTGGGAGGTCAAGGCTGCAGT#TAATCTGCTGGCCTTGGCCTCCCAA#.(((((((((((((((((((.#.)))).))))))))))))))).	3539	3564	1	-36.7	1	0.000140909	0.471	1.1095	1.68198	-3.79332	19	22	15	3UTR	MIRT681892	0	1
hsa-miR-21-3p	NM_001174127	SLC11A2	CAACACCAGTCGATGGGCTGT#ACGGGATTTCACCATGTTGCCCAGGCTGGTGTTGA#(((((((((((..(((((...#.)))))))))))))))).	3484	3519	1	-28	1	6.44543e-06	0.485	0	0	-8.57351	16	18	16	3UTR		0	1
hsa-miR-30b-3p	NM_001174127	SLC11A2	CTGGGAGGTGGATGTTTACTTC#AACCTCTACCTCCCCGG#(.((((((((((.(((......#))).)))))))))).).	3106	3123	1	-20.3	1	0.030752	0.5	0	0	-6.39038	14	17	10	3UTR	MIRT681891	0	1
hsa-miR-30b-3p	NM_001174127	SLC11A2	CTGGGAGGTGGATGTTTACTTC#GGCCTTGGCCTCCCAA#.((((((((.((.(((......#))).)).)))))))).	3543	3559	1	-18.8	1	0.000140909	0.471	0	0	-6.32496	13	16	8	3UTR	MIRT681891	0	1
hsa-miR-367-3p	NM_001174127	SLC11A2	AATTGCACTTTAGCAATGGTGA#TCTTGCTCTGTTGCCCAGGCTGGAGTGCAGTG#.(((((((((((((...(((((#.)))))...))))))))))))).	3324	3356	1	-24	1	3.23997e-05	0.426	0	0	-4.76182	18	23	13	3UTR		0	1
hsa-miR-383-3p	NM_001174127	SLC11A2	ACAGCACTGCCTGGTCAGA#TTGCCCAGGCTGGTGTTGA#.(((((((((((((.(((.#))).)))))).))))))).	3500	3519	1	-22.9	1	6.44543e-06	0.485	0	0	-4.52877	16	19	7	3UTR		0	1
hsa-miR-423-3p	NM_001174127	SLC11A2	AGCTCGGTCTGAGGCCCCTCAGT#GCTGGGATTACAGGCACCACATTTTTAGTGGAGATGGGGTTTCACCATGTTGGCCAGGCTG#((((.(((((((((((((((...#.)).))))))))).......)))).)))).	3157	3218	1	-24.8	0	0.000155481	0.529	0	0	-8.05661	19	30	9	3UTR	MIRT016685	0	1
hsa-miR-551b-5p	NM_001174127	SLC11A2	GAAATCAAGCGTGGGTGAGACC#TTTCACCCACCTTC#......(((.((((((((((..#))))))))))))).	2968	2982	1	-18	0	0.497008	0.662	0	0	-16.8091	13	14	13	3UTR		0	1
hsa-miR-3158-3p	NM_001174127	SLC11A2	AAGGGCTTCCTCTCTGCAGGAC#TTTTGTAGAGACGGGATTTCACCATGTTGCCCA#..(((((((((((((((((((.#))))))))))).))))............)))).	3474	3507	1	-23.2	1	0.0126309	0.559	0	0	-4.957	19	33	11	3UTR		0	1
hsa-miR-4260	NM_001174127	SLC11A2	CTTGGGGCATGGAGTCCCA#GGGATTTCACCATGTTGCCCAGGC#((((((((((((((((((.#))))))...))))))..)))))).	3486	3510	1	-24.5	1	0.000818443	0.559	0	0	-3.93757	18	24	6	3UTR		0	1
hsa-miR-4284	NM_001174127	SLC11A2	GGGCTCACATCACCCCAT#GGTGTGAGCCA#.((((((((((.......#)))))))))).	3280	3291	1	-19.5	1	0.000249491	0.485	0	0	-10.2546	10	11	10	3UTR		0	1
hsa-miR-3663-5p	NM_001174127	SLC11A2	GCTGGTCTGCGTGGTGCTCGG#TGGAGATGGGGTTTCACCATGTTGGCCAGG#.((((((.(((((((((((.(#.).)))...)))))))).)))))).	3185	3215	1	-24.3	1	0.000918287	0.529	0	0	-6.10696	18	25	8	3UTR		0	1
hsa-miR-3689a-3p	NM_001174127	SLC11A2	CTGGGAGGTGTGATATCGTGGT#GTCATACACTCCCAGA#((((((((((((((........#))))))).))))))).	2011	2027	1	-22.5	1	0.0320107	0.485	0	0	-4.90607	14	16	7	3UTR	MIRT681890	0	1
hsa-miR-3689b-3p	NM_001174127	SLC11A2	CTGGGAGGTGTGATATTGTGGT#GCTATAAATGTAGGTCAGAGACCCACCCACCTCATAACAGTCATACACTCCCAGA#((((((((((((((.((((((.#.))))))..))))))).))))))).	1972	2027	1	-25.8	1	0.0320107	0.485	0	0	-4.67302	20	25	7	3UTR	MIRT681889	0	1
hsa-miR-3929	NM_001174127	SLC11A2	GAGGCTGATGTGAGTAGACCACT#GGCTGGTCTCAAACTCTTGACCTCAAGTGATCTACCTGCCTCAGCCTCC#((((((((.(((.(((((.((((#.)))).))))).))).)))))))).	3213	3262	1	-27.3	1	0.00788181	0.485	0	0	-6.28309	20	25	8	3UTR	MIRT681913	0	1
hsa-miR-3929	NM_001174127	SLC11A2	GAGGCTGATGTGAGTAGACCACT#AGTAATCTGCTGGCCTTGGCCTCC#((((((((.((.((((((..(((#)))..)))))).)).)))))))).	3532	3556	1	-24.4	1	9.95618e-05	0.485	0	0	-8.34077	19	24	8	3UTR	MIRT681913	0	1
hsa-miR-3934-3p	NM_001174127	SLC11A2	TGCTCAGGTTGCACAGCTGGGA#CCCAGGCTGGAGTGCAGTGGTGTGATCTCAGCTCACTGCAACTTCTGCCACCTGGGCT#.((((((((((((.((((((((#.))))))))...)))).........)))))))).	3337	3395	1	-27.4	1	4.59128e-05	0.456	0	0	-4.65016	20	34	8	3UTR		0	1
hsa-miR-4478	NM_001174127	SLC11A2	GAGGCTGAGCTGAGGAG#CTCCCCGGTTTAATCGATTCTCCTCCTTCAGCCTCC#(((((((((..((((((#.)))))).))))))))).	3115	3151	1	-24.5	1	0.0120414	0.5	0	0	-8.00486	15	18	9	3UTR	MIRT681911	0	1
hsa-miR-3689c	NM_001174127	SLC11A2	CTGGGAGGTGTGATATTGTGGT#GCTATAAATGTAGGTCAGAGACCCACCCACCTCATAACAGTCATACACTCCCAGA#((((((((((((((.((((((.#.))))))..))))))).))))))).	1972	2027	1	-25.8	1	0.0320107	0.485	0	0	-4.67302	20	25	7	3UTR	MIRT681888	0	1
hsa-miR-4524a-5p	NM_001174127	SLC11A2	ATAGCAGCATGAACCTGTCTCA#GAGACGGGATTTCACCATGTTGCC#...((((((((((((((((((.#)))))))).))....)))))))).	3481	3505	1	-23.6	0	0.00966831	0.559	0	0	-6.51454	18	24	8	3UTR		0	1
hsa-miR-4529-5p	NM_001174127	SLC11A2	AGGCCATCAGCAGTCCAATGAA#TCATACACTCCCAGAGTTAAACGATTGGCCTCTGATGGCCA#.(((((((((.((.(((((...#.))))).))))))))))).	2012	2053	1	-25.5	1	1.85815e-07	0.485	0	0	-7.47494	16	19	11	3UTR		0	1
hsa-miR-4655-5p	NM_001174127	SLC11A2	CACCGGGGATGGCAGAGGGTCG#TGACGTGATCTCAGTTCACTGTAACCTCTACCTCCCCGGTT#.((((((((.((.(((((..((#.))...))))).)))))))))).	3084	3125	1	-26.4	1	0.0274193	0.5	0	0	-6.32496	17	23	10	3UTR	MIRT461175	0	1
hsa-miR-4655-5p	NM_001174127	SLC11A2	CACCGGGGATGGCAGAGGGTCG#CTTCTGCCACCTGGGC#..((.(((.(((((((((....#)))))))))))).)).	3378	3394	1	-24.9	0	3.01862e-05	0.441	0	0	-10.1324	14	16	12	3UTR	MIRT461175	0	1
hsa-miR-4701-3p	NM_001174127	SLC11A2	ATGGGTGATGGGTGTGGTGT#CACCACACCCAGCTA#...(((..(((((((((((.#)))))))))))))).	3448	3463	1	-22.8	0	0.0429358	0.544	0	0	-10.3719	14	15	14	3UTR		0	1
hsa-miR-4784	NM_001174127	SLC11A2	TGAGGAGATGCTGGGACTGA#TCCAGCTCACTCCTCAT#(((((((..((((((.....#))))))...))))))).	3590	3607	1	-20.8	1	0.0250117	0.515	0	0	-7.54065	13	17	7	3UTR		0	1
hsa-miR-5195-3p	NM_001174127	SLC11A2	ATCCAGTTCTCTGAGGGGGCT#AGCCTCCTGAATAGCTGGG#..((((((...(.((((((((#)))))))).)..)))))).	3144	3163	1	-22	1	4.53127e-05	0.559	0	0	-11.3698	15	19	8	3UTR		0	1
hsa-miR-6728-5p	NM_001174127	SLC11A2	TTGGGATGGTAGGACCAGAGGGG#CCACCTGGGCTTAAGCCATCCTC#..(((((((((((.((((..((.#))..)))).)))..)))))))).	3384	3407	1	-24.2	1	0.000585341	0.456	0	0	-5.81384	17	23	8	3UTR		0	1
hsa-miR-6733-5p	NM_001174127	SLC11A2	TGGGAAAGACAAACTCAGAGTT#GACTTTGAGCATCACTTTCCCC#.(((((((.....(((((((((#))))))))).....))))))).	3658	3680	1	-20.7	1	0.136647	0.559	0	0	-13.5529	16	22	9	3UTR		0	1
hsa-miR-6748-5p	NM_001174127	SLC11A2	TGTGGGTGGGAAGGACTGGATT#GGTCAGAGACCCACCCACC#.(((((((((...((((.....#)))).....))))))))).	1984	2003	1	-22.7	1	0.00725958	0.559	0	0	-11.254	13	19	9	3UTR		0	1
hsa-miR-6769a-5p	NM_001174127	SLC11A2	AGGTGGGTATGGAGGAGCCCT#GGGCTTAAGCCATCCTCCCACTTC#(((((((.((((..((((((.#))))))...))))...))))))).	3390	3414	1	-24.4	1	0.172198	0.441	0	0	-8.39718	17	24	7	3UTR		0	1
hsa-miR-6769a-5p	NM_001174127	SLC11A2	AGGTGGGTATGGAGGAGCCCT#GGGGTTTCACCATGTTGGCCA#.(((.(((((((.((((((((#)))))))).))))))).))).	3192	3213	1	-23.8	0	0.00279895	0.515	0	0	-9.20149	18	21	8	3UTR		0	1
hsa-miR-6779-5p	NM_001174127	SLC11A2	CTGGGAGGGGCTGGGTTTGGC#GCCACTGCATCCAGCTCACTCCTC#..((((((((((((((.((((#))))....))))))))).))))).	3581	3605	1	-26.3	1	0.0207353	0.515	0	0	-4.957	18	24	9	3UTR	MIRT681887	0	1
hsa-miR-6799-5p	NM_001174127	SLC11A2	GGGGAGGTGTGCAGGGCTGG#TCAGCAAATCCTGCAGCCTTTGTGTGACTTTGAGCATCACTTTCCCC#(((((((((((((((((((.#.))))))).............))).))))))))).	3633	3680	1	-26.3	1	0.136647	0.559	0	0	-3.93757	19	35	9	3UTR	MIRT461161	0	1
hsa-miR-6799-5p	NM_001174127	SLC11A2	GGGGAGGTGTGCAGGGCTGG#TCAGTTCACTGTAACCTCTACCTCCCCG#((((((((((((((((((((#))))))..))))).....))))))))).	3094	3122	1	-26.1	1	0.0313699	0.5	0	0	-3.93757	20	28	9	3UTR	MIRT461161	0	1
hsa-miR-6824-5p	NM_001174127	SLC11A2	GTAGGGGAGGTTGGGCCAGGGA#TCTGCTGGCCTTGGCCTCCCA#....(((((((.((((((((((#))).)))))))..))))))).	3537	3558	1	-29.2	0	7.9184e-05	0.485	0	0	-12.8934	17	21	7	3UTR		0	1
hsa-miR-6824-5p	NM_001174127	SLC11A2	GTAGGGGAGGTTGGGCCAGGGA#CCTGCCTCAGCCTCCCA#....(((((((((((.((((..#)))).))))))))))).	3247	3264	1	-28.8	0	0.00821959	0.471	0	0	-9.77961	15	17	11	3UTR		0	1
hsa-miR-6838-5p	NM_001174127	SLC11A2	AAGCAGCAGTGGCAAGACTCCT#AGGGTCTTGCTCTGTTGCC#..(((((((.((((((((.(((#)))))))))))))))))).	3320	3339	1	-27	1	1.95814e-05	0.485	0	0	-6.19951	18	19	18	3UTR		0	1
hsa-miR-6838-5p	NM_001174127	SLC11A2	AAGCAGCAGTGGCAAGACTCCT#GAGTCTTGCCCTGTCGCC#..((.((((.((((((((((..#)))))))))))))).)).	3051	3069	1	-26.9	0	0.00369893	0.559	0	0	-10.3185	16	18	14	3UTR		0	1
hsa-miR-6843-3p	NM_001174127	SLC11A2	ATGGTCTCCTGTTCTCTGCAG#TTGTAGAGACGGGATTTCACCATG#(((((.(((((.(((((((((#))))))))))))))....))))).	3476	3500	1	-21.9	0	0.00189881	0.588	0	0	-9.18534	19	24	14	3UTR		0	1
hsa-miR-6769b-5p	NM_001174127	SLC11A2	TGGTGGGTGGGGAGGAGAAGTGC#TATAGATTTTTTTTTTCACCCACCT#.((((((((((((((((((....#.)))))))))))))))))).	2955	2980	1	-24.9	1	0.558554	0.662	0	0	-3.79332	18	20	18	3UTR		0	1
hsa-miR-7106-5p	NM_001174127	SLC11A2	TGGGAGGAGGGGATCTTGGG#CCCGGTTTAATCGATTCTCCTCCTTCA#..((((((((((((((((((#))))).......))))).)))))))).	3118	3145	1	-22.5	1	0.122493	0.485	0	0	-4.957	18	27	8	3UTR	MIRT681900	0	1
hsa-miR-1273h-5p	NM_001174127	SLC11A2	CTGGGAGGTCAAGGCTGCAGT#TAATCTGCTGGCCTTGGCCTCCCAA#.(((((((((((((((((((.#.)))).))))))))))))))).	3534	3559	1	-36.7	1	0.000140909	0.471	0	0	-3.79332	19	22	15	3UTR	MIRT681892	0	1
hsa-miR-15a-5p	NM_001174129	SLC11A2	TAGCAGCACATAATGGTTTGTG#TGTGCTGCTAC#((((((((((............#)))))))))).	4260	4271	1	-16.8	1	0.0179169	0.662	-0.447067	-0.264908	-13.2236	10	11	10	3UTR		0	1
hsa-miR-16-5p	NM_001174129	SLC11A2	TAGCAGCACGTAAATATTGGCG#GCCAAAAGTATGTGCCGTTGC#((((.(((((((....(((((.#)))))...))))))).)))).	2163	2184	1	-19.4	0	5.52625e-05	0.559	0.348573	0.287307	-11.1711	16	21	7	3UTR	MIRT031729	0	1
hsa-miR-30b-3p	NM_001174129	SLC11A2	CTGGGAGGTGGATGTTTACTTC#TAAAGCCACCTCTCAGC#(((((((((((...........#.))))))))))).	3019	3036	1	-20.8	1	0.0130362	0.529	2.62619	2.94746	-10.3988	11	13	11	3UTR	MIRT681891	0	1
hsa-miR-195-5p	NM_001174129	SLC11A2	TAGCAGCACAGAAATATTGGC#AATAATTGTGCTGCTAC#(((((((((((..........#.))))))))))).	4254	4271	1	-17.1	1	0.0179169	0.662	-0.326224	-0.279677	-10.3988	11	13	11	3UTR		0	1
hsa-miR-383-3p	NM_001174129	SLC11A2	ACAGCACTGCCTGGTCAGA#CTGACAACTAACAAAACCAGCACCACATCGCTAGGTGGTGCTT#..(((((((((((((....#.))))))))))))).	2718	2761	1	-21.2	1	3.0745e-06	0.559	3.04179	4.84438	-5.19005	13	15	13	3UTR		0	1
hsa-miR-570-5p	NM_001174129	SLC11A2	AAAGGTAATTGCAGTTTTTCCC#GGGAAAAACTGACAACTAACAAAACCA#...(((..((((((((((((((#))))))))))).)))........))).	2710	2737	1	-17.6	0	0.0737599	0.588	2.99581	4.65364	-10.3719	17	27	11	3UTR		0	1
hsa-miR-1323	NM_001174129	SLC11A2	TCAAAACTGAGGGGCATTTTCT#GCCCCTCAAGTA#.....((((((((((.......#)))))))).)).	3649	3661	1	-18.5	0	0.336811	0.647	3.83105	4.19036	-13.8986	10	12	8	3UTR		0	1
hsa-miR-1200	NM_001174129	SLC11A2	CTCCTGAGCCATTCTGAGCCTC#GAGGTTCTGCTAGTGGTGTTAGGAGT#(((((((((((((..(((((((#)))))))....)))))).))))))).	4320	4346	1	-25.4	1	0.000951481	0.559	-0.601797	-0.465529	-5.52986	20	26	7	3UTR		0	1
hsa-miR-1200	NM_001174129	SLC11A2	CTCCTGAGCCATTCTGAGCCTC#GCTCTATCAGGCTTAGGAT#.(((((((((.....((((...#)))).....))))))))).	2627	2646	1	-21.9	1	0.00490993	0.676	4.79198	4.35661	-12.8463	13	19	9	3UTR		0	1
hsa-miR-3160-3p	NM_001174129	SLC11A2	AGAGCTGAGACTAGAAAGCCCA#TGGGTCCAGTCAGTCTCAGA#....((((((((.((..(((((#)))))....)))))))))).	3892	3912	1	-20.2	0	0.00556418	0.515	0.816809	1.80035	-11.0687	15	20	10	3UTR		0	1
hsa-miR-4283	NM_001174129	SLC11A2	TGGGGCTCAGCGAGTTT#TTCATCTGAGCCCCC#.(((((((((.(((...#)))..))))))))).	3520	3535	1	-19.5	1	0.00412182	0.529	5.73039	4.46753	-7.5866	12	15	9	3UTR		0	1
hsa-miR-3934-3p	NM_001174129	SLC11A2	TGCTCAGGTTGCACAGCTGGGA#TCCTGGCTGATTGGTGTTCGCTGTTCATCTGAGCC#.((((((((.((((((((((((#)))))))))............)))..)))))))).	3497	3532	1	-24.4	1	0.000717819	0.529	4.74901	4.91493	-5.03583	20	35	9	3UTR		0	1
hsa-miR-548ai	NM_001174129	SLC11A2	AAAGGTAATTGCAGTTTTTCCC#GGGAAAAACTGACAACTAACAAAACCA#...(((..((((((((((((((#))))))))))).)))........))).	2710	2737	1	-17.6	0	0.0737599	0.588	2.99581	4.65364	-10.3719	17	27	11	3UTR		0	1
hsa-miR-4487	NM_001174129	SLC11A2	AGAGCTGGCTGAAGGGCAG#TTGCCCAAGGGCCAGCTCA#.(((((((((...((((((#))))))...))))))))).	2354	2373	1	-28.8	1	0.00027297	0.559	2.38258	2.44376	-11.254	15	19	9	3UTR		0	1
hsa-miR-4539	NM_001174129	SLC11A2	GCTGAACTGGGCTGAGCTGGGC#GGCCAGCTCAGTTTATCCTTCGGA#.(((((.(((((((((((((.(#).)))))))))))))...))))).	2363	2387	1	-26.7	0	0.0018165	0.544	1.87566	2.44646	-5.33701	19	24	13	3UTR		0	1
hsa-miR-4708-5p	NM_001174129	SLC11A2	AGAGATGCCGCCTTGCTCCTT#GGATTAGGGTGGGATCTTTG#((((((.((((((((.(((..#))).)))))))).)))))).	2286	2306	1	-24.2	0	0.000402615	0.574	3.03495	2.1096	-5.71431	17	20	8	3UTR		0	1
hsa-miR-5195-3p	NM_001174129	SLC11A2	ATCCAGTTCTCTGAGGGGGCT#GGCCAGCTCAGTTTATCCTTCGGAGAGACAAGGATA#((((..(((((((((((((((#))))............)))))))))))....)))).	2363	2399	1	-22.4	0	0.00138623	0.574	2.84756	2.46405	-9.95757	19	36	11	3UTR		0	1
hsa-miR-6134	NM_001174129	SLC11A2	TGAGGTGGTAGGATGTAGA#TCTATTTTGTTCCTAAAGCCACCTCT#.((((((((((((.(((((#))))).....))))...)))))))).	3006	3032	1	-19.5	1	0.185121	0.544	2.49126	3.03972	-4.65016	17	26	8	3UTR		0	1
hsa-miR-6513-5p	NM_001174129	SLC11A2	TTTGGGATTGACGCCACATGTCT#ACATGTATCTTTGCCCTGGGTCTGGGTGGGTCCAGTCAGTCTCAGAT#(((((((((((((((.(((.(..#.).))))))...)))))))))))).	3866	3913	1	-20.5	1	0.00768497	0.5	2.23007	1.91349	-4.17062	19	25	12	3UTR	MIRT681881	0	1
hsa-miR-12119	NM_001174129	SLC11A2	TTCTGAGGGGACGGTAGATTTGGGG#CCCTGGGTCTGGGTGGGTCCAGTCAGTCTCAGAT#.(((((((((((..(((((((((((#))))))))))).....))))......))))))).	3879	3913	1	-25.5	1	0.00768497	0.5	2.00441	1.69644	-5.9393	22	34	11	3UTR		0	1
hsa-miR-15a-5p	NM_001174130	SLC11A2	TAGCAGCACATAATGGTTTGTG#TGTGCTGCTAC#((((((((((............#)))))))))).	3920	3931	1	-16.8	1	0.0179169	0.662	1.22572	1.31288	-13.2236	10	11	10	3UTR		0	1
hsa-miR-16-5p	NM_001174130	SLC11A2	TAGCAGCACGTAAATATTGGCG#GCCAAAAGTATGTGCCGTTGC#((((.(((((((....(((((.#)))))...))))))).)))).	1823	1844	1	-19.4	0	5.52625e-05	0.559	0.503185	0.0776151	-11.1711	16	21	7	3UTR	MIRT031729	0	1
hsa-miR-16-5p	NM_001174130	SLC11A2	TAGCAGCACGTAAATATTGGCG#TGTGCTGCTAC#((((((((((............#)))))))))).	3920	3931	1	-16.1	1	0.0179169	0.662	1.22572	1.31288	-13.2236	10	11	10	3UTR	MIRT031729	0	1
hsa-miR-148a-5p	NM_001174130	SLC11A2	AAAGTTCTGAGACACTCCGACT#GGTCTGGGTGGGTCCAGTCAGTCTCAGAT#.....(((((((((((((.(((#.))).))...)))..)))))))).	3544	3573	1	-18.1	0	0.00768497	0.5	4.99779	4.70874	-13.6656	16	24	8	3UTR		0	1
hsa-miR-223-3p	NM_001174130	SLC11A2	TGTCAGTTTGTCAAATACCCCA#TGGGATCTTTGAAAAGCTGACAT#(((((((((.(((((...((((#))))...))))).))))))))).	1955	1978	1	-20.8	1	0.0543453	0.618	1.09586	0.15067	-5.41313	18	23	9	3UTR		0	1
hsa-miR-223-3p	NM_001174130	SLC11A2	TGTCAGTTTGTCAAATACCCCA#GGGGAAAAACTGACAA#(((((((((........((((.#))))..))))))))).	2369	2385	1	-17.5	1	0.0829609	0.559	2.08194	2.42076	-14.4661	13	16	9	3UTR		0	1
hsa-miR-30b-3p	NM_001174130	SLC11A2	CTGGGAGGTGGATGTTTACTTC#TAAAGCCACCTCTCAGC#(((((((((((...........#.))))))))))).	2679	2696	1	-20.8	1	0.0130362	0.529	4.60611	4.40838	-10.3988	11	13	11	3UTR	MIRT681891	0	1
hsa-miR-195-5p	NM_001174130	SLC11A2	TAGCAGCACAGAAATATTGGC#AATAATTGTGCTGCTAC#(((((((((((..........#.))))))))))).	3914	3931	1	-17.1	1	0.0179169	0.662	0.634853	1.50658	-10.3988	11	13	11	3UTR		0	1
hsa-miR-383-3p	NM_001174130	SLC11A2	ACAGCACTGCCTGGTCAGA#CTGACAACTAACAAAACCAGCACCACATCGCTAGGTGGTGCTT#..(((((((((((((....#.))))))))))))).	2378	2421	1	-21.2	1	3.0745e-06	0.559	4.56472	2.81715	-5.19005	13	15	13	3UTR		0	1
hsa-miR-1323	NM_001174130	SLC11A2	TCAAAACTGAGGGGCATTTTCT#GCCCCTCAAGTA#.....((((((((((.......#)))))))).)).	3309	3321	1	-18.5	0	0.336811	0.647	3.31451	3.68879	-13.8986	10	12	8	3UTR		0	1
hsa-miR-1200	NM_001174130	SLC11A2	CTCCTGAGCCATTCTGAGCCTC#GCTCTATCAGGCTTAGGAT#.(((((((((.....((((...#)))).....))))))))).	2287	2306	1	-21.9	1	0.00490993	0.676	3.72942	1.99732	-12.8463	13	19	9	3UTR		0	1
hsa-miR-4251	NM_001174130	SLC11A2	CCTGAGAAAAGGGCCAA#TGGTGCTTACTAATTACCTTCTCAGGA#(((((((((((.((((.#)))).)))..........)))))))).	2413	2440	1	-19	1	0.0220533	0.588	4.1211	3.11565	-7.28438	15	27	8	3UTR		0	1
hsa-miR-4283	NM_001174130	SLC11A2	TGGGGCTCAGCGAGTTT#TTCATCTGAGCCCCC#.(((((((((.(((...#)))..))))))))).	3180	3195	1	-19.5	1	0.00412182	0.529	5.82521	4.58671	-7.5866	12	15	9	3UTR		0	1
hsa-miR-3934-3p	NM_001174130	SLC11A2	TGCTCAGGTTGCACAGCTGGGA#TCCTGGCTGATTGGTGTTCGCTGTTCATCTGAGCC#.((((((((.((((((((((((#)))))))))............)))..)))))))).	3157	3192	1	-24.4	1	0.000717819	0.529	2.53352	5.23425	-5.03583	20	35	9	3UTR		0	1
hsa-miR-4476	NM_001174130	SLC11A2	CAGGAAGGATTTAGGGACAGGC#GCCTGTTAGTACAGAGCTTTCCTGA#((((((((.......(((((((#))))))).........)))))))).	2492	2517	1	-21.6	1	0.000254563	0.603	1.97211	3.37931	-15.2895	15	25	8	3UTR		0	1
hsa-miR-4487	NM_001174130	SLC11A2	AGAGCTGGCTGAAGGGCAG#TTGCCCAAGGGCCAGCTCA#.(((((((((...((((((#))))))...))))))))).	2014	2033	1	-28.8	1	0.00027297	0.559	-0.383257	0.153375	-11.254	15	19	9	3UTR		0	1
hsa-miR-4708-5p	NM_001174130	SLC11A2	AGAGATGCCGCCTTGCTCCTT#GGATTAGGGTGGGATCTTTG#((((((.((((((((.(((..#))).)))))))).)))))).	1946	1966	1	-24.2	0	0.000402615	0.574	0.004562	0.222371	-5.71431	17	20	8	3UTR		0	1
hsa-miR-4728-5p	NM_001174130	SLC11A2	TGGGAGGGGAGAGGCAGCAAGCA#GCTGCTGCTTTTACTTCAGCCAC#(((..(((((((((((((.(((.#)))))))))))).))))..))).	2968	2991	1	-25.4	0	0.00663432	0.544	2.30601	3.45065	-11.0886	19	23	12	3UTR	MIRT681898	0	1
hsa-miR-6071	NM_001174130	SLC11A2	TTCTGCTGCCGGCCAAGGC#GCTCTCACCTGGCTGCAGTAGGAA#((((((((.(((((.(((.#.)))))))))))))))).	3453	3477	1	-23.4	1	0.000148278	0.559	4.05142	4.56951	-5.72941	16	18	16	3UTR		0	1
hsa-miR-6508-5p	NM_001174130	SLC11A2	TCTAGAAATGCATGACCCACC#GGTGGGTCCAGTCAGTCTCAGAT#((((((...((..((((((((#))))))))..))...))).))).	3550	3573	1	-19.9	0	0.00768497	0.5	4.51092	4.84855	-13.4872	16	23	8	3UTR		0	1
hsa-miR-6779-5p	NM_001174130	SLC11A2	CTGGGAGGGGCTGGGTTTGGC#GCCATCTATTTTGTTCCTAAAGCCACCTCTCAGC#(((((((((((((((..((((#))))...........)))..)))).)))))))).	2662	2696	1	-25.3	1	0.0130362	0.529	4.32247	4.20288	-4.17062	19	34	8	3UTR	MIRT681887	0	1
hsa-miR-6838-5p	NM_001174130	SLC11A2	AAGCAGCAGTGGCAAGACTCCT#GGAGTCAGAGGAAATGGGTGTCTTCAGCACAAAGCTGCTGCTTT#((((((((((((((((((.(((#.))).)))))..)).)...)))))))))).	2935	2979	1	-24.9	1	0.000229056	0.574	4.67638	3.3595	-3.93757	21	30	10	3UTR		0	1
hsa-miR-6769b-5p	NM_001174130	SLC11A2	TGGTGGGTGGGGAGGAGAAGTGC#TTTTTCCTTCCTGACCTAACCT#.(((((((((((((((((((...#)))))))))))).))))).)).	1917	1939	1	-24.1	1	0.002679	0.632	0.240345	0.237252	-3.79332	19	22	12	3UTR		0	1
hsa-miR-6895-3p	NM_001174130	SLC11A2	TGTCTCTCGCCCTTGGCCTTAG#CTAAATTCTTAAGTAGTTGCCCAAGGGCCAGCTCAGTTTATCCTTCGGAGAGACAA#((((((((((((((((......#.))))))))...................)))))))).	1998	2054	1	-25.4	1	8.27973e-05	0.529	-0.0224958	0.238605	-3.93757	16	37	8	3UTR		0	1
hsa-let-7b-5p	NM_002543	OLR1	TGAGGTAGTAGGTTGTGTGGTT#AATCCACAACCTGTTACCA#...((((((((((((((.((((#)))))))))))))))))).	1531	1550	1	-22.2	0	0.116024	0.647	0	0	-6.51454	18	19	18	3UTR		1	1
hsa-miR-498-5p	NM_002543	OLR1	TTTCAAGCCAGGGGGCGTTTTTC#GACTCCTCTTCAAGCTTGAAAA#((((((((.((((((.(((....#))).))))))...)))))))).	1144	1166	1	-18.6	1	0.0344027	0.676	0	0	-5.22701	17	22	8	3UTR		0	1
hsa-miR-520h	NM_002543	OLR1	ACAAAGTGCTTCCCTTTAGAGT#ACTTTAAAGGAAGCCTTTT#..((((.((((.((((((((((#)))))))))))))))))).	1898	1917	1	-18.6	0	0.00406002	0.618	0	0	-9.84749	18	19	18	3UTR		0	1
hsa-miR-544a	NM_002543	OLR1	ATTCTGCATTTTTAGCAAGTTC#GAACTTGCTCAAGTGCAGGC#..(((((((((..(((((((((#))))))))).))))))))).	1245	1265	1	-22.6	1	1.12544e-05	0.544	0	0	-9.59293	18	20	9	3UTR		0	1
hsa-miR-545-3p	NM_002543	OLR1	TCAGCAAACATTTATTGTGTGC#GTAGGCAAGAGATGTTTGCTT#..(((((((((((.((((.(((#))).)))).))))))))))).	1980	2001	1	-20.5	1	0.00037729	0.676	0	0	-5.81384	18	21	11	3UTR		0	1
hsa-miR-1207-5p	NM_002543	OLR1	TGGCAGGGAGGCTGGGAGGGG#CCTGTATTATTTCACCTAGCTTGTCCCAAGCTTCCCTGCCAG#(((((((((((((((((.(((#.))).))))).)))))))))))).	1066	1108	1	-37.2	1	0.00957182	0.574	0	0	-3.93757	20	24	12	3UTR		0	1
hsa-miR-3180-5p	NM_002543	OLR1	CTTCCAGACGCTCCGCCCCACGTCG#GGGGAAATATGTCTGGGAA#.(((((((((.....((((......#)))).....))))))))).	1277	1296	1	-21.9	1	0.0268438	0.544	0	0	-12.8463	13	19	9	3UTR		0	1
hsa-miR-4700-5p	NM_002543	OLR1	TCTGGGGATGAGGACAGTGTGT#ACTGTGGTCCATCTCCAGAC#((((((((((...(((((....#)))))....)))))))))).	1394	1414	1	-21.4	1	0.00166814	0.559	0	0	-11.3983	15	20	10	3UTR		0	1
hsa-miR-4747-5p	NM_002543	OLR1	AGGGAAGGAGGCTTGGTCTTAG#CTTGTCCCAAGCTTCCCTGCCA#.((.(.((((((((((......#.)))))))))).).)).	1085	1107	1	-22.1	0	0.0106805	0.574	0	0	-8.72631	13	17	10	3UTR	MIRT451714	0	1
hsa-miR-5584-5p	NM_002543	OLR1	CAGGGAAATGGGAAGAACTAGA#TCCCAAGCTTCCCTGC#(((((((.(((((.........#)))))...))))))).	1089	1105	1	-18.1	1	0.00643243	0.544	0	0	-8.07655	12	16	7	3UTR		0	1
hsa-miR-5705	NM_002543	OLR1	TGTTTCGGGGCTCATGGCCTGTG#CAGAGGCCATTCCGAAATC#.((((((((....(((((((.((#)).))))))))))))))).	1324	1343	1	-22.2	1	0.0423455	0.647	0	0	-12.4965	17	19	15	3UTR		0	1
hsa-miR-6745	NM_002543	OLR1	TGGGTGGAAGAAGGTCTGGTT#CCAGACTCTACCACTTAC#(((((((.(((..((((((..#))))))))).))))))).	1408	1426	1	-19.8	1	0.251537	0.544	0	0	-10.8871	16	18	9	3UTR		0	1
hsa-miR-6745	NM_002543	OLR1	TGGGTGGAAGAAGGTCTGGTT#GCCAGCCTGAAGTCCATTTTCCCC#.(((((((...(((.(((((.#))))))))....))))....))).	1103	1127	1	-19.3	1	0.11509	0.574	0	0	-9.65244	15	24	8	3UTR		0	1
hsa-miR-6811-3p	NM_002543	OLR1	AGCCTGTGCTTGTCCCTGCAG#GGGACAAGTGGGGAGCC#.((((.((((((((((.....#)))))))))).)).)).	1473	1490	1	-22.3	0	0.000229099	0.544	0	0	-5.69428	14	17	10	3UTR		0	1
hsa-miR-6825-5p	NM_002543	OLR1	TGGGGAGGTGTGGAGTCAGCAT#CTGATGACTCCTCCCCAG#((((((((...(..(((((...#)))))..).)))))))).	2158	2176	1	-23.3	1	0.0158747	0.529	0	0	-11.2072	14	18	8	3UTR		0	1
hsa-miR-6825-5p	NM_002543	OLR1	TGGGGAGGTGTGGAGTCAGCAT#GCTGGCTGCAGAACTCCTTT#.((((((.(.((.(((((((..#))))))).)).).)))))).	987	1007	1	-24.7	1	0.000239267	0.471	0	0	-8.6386	16	20	7	3UTR		0	1
hsa-miR-10526-3p	NM_002543	OLR1	AAAAGGGGGCTGAGGTGGAG#CTCCTCTTCAAGCTTGAAAACCCTCTGAACTCAGTCTTCTTTA#.(((((((((((((..((((#.))))...))))))))))))).	1146	1189	1	-21.9	1	0.114421	0.559	0	0	-4.76182	17	22	13	3UTR		0	1
hsa-miR-11181-3p	NM_002543	OLR1	AGGAGGAGGAGGTCAGGC#CCTGATGACTCCTCCCCA#.((.(((((((((((((.#))))))..))))))))).	2157	2175	1	-24.2	0	0.0459738	0.529	0	0	-6.82535	15	18	9	3UTR		0	1
hsa-miR-11181-3p	NM_002543	OLR1	AGGAGGAGGAGGTCAGGC#GCCTGAAGTCCATTTTCCC#.(((((((((..((((((#))))))..))).)))))).	1107	1126	1	-20.5	1	0.111464	0.574	0	0	-9.9649	15	19	6	3UTR		0	1
hsa-let-7b-5p	NM_001172632	OLR1	TGAGGTAGTAGGTTGTGTGGTT#AATCCACAACCTGTTACCA#...((((((((((((((.((((#)))))))))))))))))).	1391	1410	1	-22.2	0	0.116024	0.647	0.123412	0.031168	-6.51454	18	19	18	3UTR		1	1
hsa-miR-520g-3p	NM_001172632	OLR1	ACAAAGTGCTTCCCTTTAGAGTGT#CACTCTTCACAGGCTATTCTACTTTAAAGGAAGCCTTTT#..((((.((((.(((((((((((.#.))))))))))))))))))).	1738	1777	1	-20.4	0	0.00406002	0.618	1.0266	0.667925	-9.84749	19	21	19	3UTR		0	1
hsa-miR-520h	NM_001172632	OLR1	ACAAAGTGCTTCCCTTTAGAGT#ACTTTAAAGGAAGCCTTTT#..((((.((((.((((((((((#)))))))))))))))))).	1758	1777	1	-18.6	0	0.00406002	0.618	0.542622	1.05569	-9.84749	18	19	18	3UTR		0	1
hsa-miR-545-3p	NM_001172632	OLR1	TCAGCAAACATTTATTGTGTGC#GTAGGCAAGAGATGTTTGCTT#..(((((((((((.((((.(((#))).)))).))))))))))).	1840	1861	1	-20.5	1	0.00037729	0.676	0.475767	0.929524	-5.81384	18	21	11	3UTR		0	1
hsa-miR-3180-5p	NM_001172632	OLR1	CTTCCAGACGCTCCGCCCCACGTCG#GGGGAAATATGTCTGGGAA#.(((((((((.....((((......#)))).....))))))))).	1137	1156	1	-21.9	1	0.0268438	0.544	-0.327948	-0.168797	-12.8463	13	19	9	3UTR		0	1
hsa-miR-3660	NM_001172632	OLR1	ACTGACAGGAGAGCATTTTGA#TCAAAGTGTCACAATGCTCCTCCTGA#.....((((((((((((.(((#.))).))))))).))))).	1996	2022	1	-19.5	0	0.0198979	0.5	1.2649	0.805701	-13.6656	15	19	7	3UTR		0	1
hsa-miR-4650-3p	NM_001172632	OLR1	AGGTAGAATGAGGCCTGACAT#TTAGGCTTCTATTTCCTTTCCACCCACTCTTCACAGGCTATTCTACTTT#(((((((((..((((((....#.))))))))))))))).	1714	1763	1	-18.5	1	0.0349286	0.603	1.30574	0.816936	-8.00486	15	17	15	3UTR		0	1
hsa-miR-4700-5p	NM_001172632	OLR1	TCTGGGGATGAGGACAGTGTGT#ACTGTGGTCCATCTCCAGAC#((((((((((...(((((....#)))))....)))))))))).	1254	1274	1	-21.4	1	0.00166814	0.559	0.816054	-0.0348996	-11.3983	15	20	10	3UTR		0	1
hsa-miR-5584-5p	NM_001172632	OLR1	CAGGGAAATGGGAAGAACTAGA#TCCCAAGCTTCCCTGC#(((((((.(((((.........#)))))...))))))).	949	965	1	-18.1	1	0.00643243	0.544	-0.827966	-0.246317	-8.07655	12	16	7	3UTR		0	1
hsa-miR-6745	NM_001172632	OLR1	TGGGTGGAAGAAGGTCTGGTT#AATTAGAAATATATCTTCTATTTTTAGGCTTCTATTTCCTTTCCACCCAC#(((((((((((((((((((..#.))))))).....)))..))))))))).	1691	1741	1	-20.3	1	0.541874	0.647	0.364432	1.04469	-3.93757	19	28	9	3UTR		0	1
hsa-miR-6825-5p	NM_001172632	OLR1	TGGGGAGGTGTGGAGTCAGCAT#CTGATGACTCCTCCCCAG#((((((((...(..(((((...#)))))..).)))))))).	2018	2036	1	-23.3	1	0.0158747	0.529	1.1348	0.816671	-11.2072	14	18	8	3UTR		0	1
hsa-miR-11181-3p	NM_001172632	OLR1	AGGAGGAGGAGGTCAGGC#CCTGATGACTCCTCCCCA#.((.(((((((((((((.#))))))..))))))))).	2017	2035	1	-24.2	0	0.0459738	0.529	0.434546	0.840439	-6.82535	15	18	9	3UTR		0	1
hsa-let-7b-5p	NM_001172633	OLR1	TGAGGTAGTAGGTTGTGTGGTT#AATCCACAACCTGTTACCA#...((((((((((((((.((((#)))))))))))))))))).	1415	1434	1	-22.2	0	0.116024	0.647	0.123412	-0.0833495	-6.51454	18	19	18	3UTR		1	1
hsa-miR-520g-3p	NM_001172633	OLR1	ACAAAGTGCTTCCCTTTAGAGTGT#CACTCTTCACAGGCTATTCTACTTTAAAGGAAGCCTTTT#..((((.((((.(((((((((((.#.))))))))))))))))))).	1762	1801	1	-20.4	0	0.00406002	0.618	1.66082	1.08344	-9.84749	19	21	19	3UTR		0	1
hsa-miR-518a-5p	NM_001172633	OLR1	CTGCAAAGGGAAGCCCTTTC#GGCTGCAGAACTCCTTTGCAGA#((((((((((.((((.....#)))).......)))))))))).	874	896	1	-18.3	1	0.000314438	0.5	0.365031	-0.0428281	-6.9954	14	22	10	3UTR		0	1
hsa-miR-527	NM_001172633	OLR1	CTGCAAAGGGAAGCCCTTTC#GGCTGCAGAACTCCTTTGCAGA#((((((((((.((((.....#)))).......)))))))))).	874	896	1	-18.3	1	0.000314438	0.5	0.365031	-0.0428281	-6.9954	14	22	10	3UTR		0	1
hsa-miR-545-3p	NM_001172633	OLR1	TCAGCAAACATTTATTGTGTGC#GTAGGCAAGAGATGTTTGCTT#..(((((((((((.((((.(((#))).)))).))))))))))).	1864	1885	1	-20.5	1	0.00037729	0.676	0.475767	1.40946	-5.81384	18	21	11	3UTR		0	1
hsa-miR-3180-5p	NM_001172633	OLR1	CTTCCAGACGCTCCGCCCCACGTCG#GGGGAAATATGTCTGGGAA#.(((((((((.....((((......#)))).....))))))))).	1161	1180	1	-21.9	1	0.0268438	0.544	-0.390589	-0.152941	-12.8463	13	19	9	3UTR		0	1
hsa-miR-3660	NM_001172633	OLR1	ACTGACAGGAGAGCATTTTGA#TCAAAGTGTCACAATGCTCCTCCTGA#.....((((((((((((.(((#.))).))))))).))))).	2020	2046	1	-19.5	0	0.0198979	0.5	1.2649	0.805701	-13.6656	15	19	7	3UTR		0	1
hsa-miR-4650-3p	NM_001172633	OLR1	AGGTAGAATGAGGCCTGACAT#TTAGGCTTCTATTTCCTTTCCACCCACTCTTCACAGGCTATTCTACTTT#(((((((((..((((((....#.))))))))))))))).	1738	1787	1	-18.5	1	0.0349286	0.603	1.26811	0.932585	-8.00486	15	17	15	3UTR		0	1
hsa-miR-4700-5p	NM_001172633	OLR1	TCTGGGGATGAGGACAGTGTGT#ACTGTGGTCCATCTCCAGAC#((((((((((...(((((....#)))))....)))))))))).	1278	1298	1	-21.4	1	0.00166814	0.559	-0.339693	0.13071	-11.3983	15	20	10	3UTR		0	1
hsa-miR-5584-5p	NM_001172633	OLR1	CAGGGAAATGGGAAGAACTAGA#TCCCAAGCTTCCCTGC#(((((((.(((((.........#)))))...))))))).	973	989	1	-18.1	1	0.00643243	0.544	-0.264187	-0.347621	-8.07655	12	16	7	3UTR		0	1
hsa-miR-6745	NM_001172633	OLR1	TGGGTGGAAGAAGGTCTGGTT#AATTAGAAATATATCTTCTATTTTTAGGCTTCTATTTCCTTTCCACCCAC#(((((((((((((((((((..#.))))))).....)))..))))))))).	1715	1765	1	-20.3	1	0.541874	0.647	0.841165	0.931235	-3.93757	19	28	9	3UTR		0	1
hsa-miR-6825-5p	NM_001172633	OLR1	TGGGGAGGTGTGGAGTCAGCAT#CTGATGACTCCTCCCCAG#((((((((...(..(((((...#)))))..).)))))))).	2042	2060	1	-23.3	1	0.0158747	0.529	1.1348	0.816671	-11.2072	14	18	8	3UTR		0	1
hsa-miR-10526-3p	NM_001172633	OLR1	AAAAGGGGGCTGAGGTGGAG#CTGCATTTTAGCTGCCTTC#..((((.((((((((((.((#)).)))))))))).)))).	703	722	1	-21.8	0	3.66297e-07	0.574	0.083142	-0.0578032	-6.50069	16	19	10	3UTR		0	1
hsa-miR-10526-3p	NM_001172633	OLR1	AAAAGGGGGCTGAGGTGGAG#CTCCTCTTCAAGCTTGAAAACCCTCTGAACTCAGTCTTCTTTA#.(((((((((((((..((((#.))))...))))))))))))).	1030	1073	1	-21.9	1	0.114421	0.559	0.00995858	-0.211962	-4.76182	17	22	13	3UTR		0	1
hsa-miR-11181-3p	NM_001172633	OLR1	AGGAGGAGGAGGTCAGGC#CCTGATGACTCCTCCCCA#.((.(((((((((((((.#))))))..))))))))).	2041	2059	1	-24.2	0	0.0459738	0.529	0.434546	0.840439	-6.82535	15	18	9	3UTR		0	1
hsa-miR-519c-3p	NM_001319108	OSM	AAAGTGCATCTTTTTAGAGGAT#GTCCCCAAACCTGTTCCCCTCTGCTACTAGCCACTGAGAAGTGCACTTTA#((((((((.((((((((.((..#.)).)))))))))))))))).	1489	1539	1	-21.2	1	0.0130245	0.441	0.0294491	-0.0246147	-4.99396	18	21	16	3UTR		0	1
hsa-miR-507	NM_001319108	OSM	TTTTGCACCTTTTGGAGTGAA#CACTTTAAGAGGTGGGAGC#.(((.((((((((((((((..#)))))))))))))).))).	1532	1551	1	-22.2	0	4.62358e-06	0.426	-0.40821	0.0524761	-7.91236	17	19	14	3UTR		0	1
hsa-miR-765	NM_001319108	OSM	TGGAGGAGAAGGAAGGTGATG#GCCGGTCCTTCCCTCTC#.(((((.((((((.(((....#)))..))))))))))).	1750	1767	1	-20.5	0	0.0156674	0.324	-0.0573199	-0.335982	-6.19385	14	17	11	3UTR		0	1
hsa-let-7b-5p	NM_020530	OSM	TGAGGTAGTAGGTTGTGTGGTT#GCCACGTGGCCTGGGGCAGGTCACTTTACCTCT#.((((((((((((((((((((.#)))))))))))))............))))))).	1393	1426	1	-21.8	1	0.00140399	0.456	-0.801457	-0.0289424	-3.79332	20	33	13	3UTR		0	1
hsa-miR-519c-3p	NM_020530	OSM	AAAGTGCATCTTTTTAGAGGAT#GTCCCCAAACCTGTTCCCCTCTGCTACTAGCCACTGAGAAGTGCACTTTA#((((((((.((((((((.((..#.)).)))))))))))))))).	893	943	1	-21.2	1	0.0130245	0.441	-0.188533	-0.0606529	-4.99396	18	21	16	3UTR		0	1
hsa-miR-507	NM_020530	OSM	TTTTGCACCTTTTGGAGTGAA#CACTTTAAGAGGTGGGAGC#.(((.((((((((((((((..#)))))))))))))).))).	936	955	1	-22.2	0	4.62358e-06	0.426	-0.532506	-0.179316	-7.91236	17	19	14	3UTR		0	1
hsa-miR-766-5p	NM_020530	OSM	AGGAGGAATTGGTGCTGGTCTT#AGGGCCGTTGCCCCCAGACTTCCTCCTT#((((((((((((.(((((((((#)))))))..))..))))..)))))))).	1180	1208	1	-22.9	1	0.0786483	0.412	-0.427175	0.164	-5.22671	21	28	8	3UTR		0	1
hsa-miR-765	NM_020530	OSM	TGGAGGAGAAGGAAGGTGATG#GCCGGTCCTTCCCTCTC#.(((((.((((((.(((....#)))..))))))))))).	1154	1171	1	-20.5	0	0.0156674	0.324	0.237732	-0.0664137	-6.19385	14	17	11	3UTR		0	1
hsa-miR-4298	NM_020530	OSM	CTGGGACAGGAGGAGGAGGCAG#CTGGCCTCCTATGCCTCATCATGTCCCAA#.(((((((((((((((((((((#))).))))))...))))..).))))))).	1241	1270	1	-28.4	1	0.155263	0.426	-0.427175	-0.332626	-3.79332	21	29	7	3UTR		0	1
hsa-miR-4257	NM_020530	OSM	CCAGAGGTGGGGACTGAG#TTGGGTCCTCGCTGCTGGC#((((.((((((((((.((#)).)))))))))).)))).	1626	1645	1	-23.2	0	3.41038e-05	0.324	-0.385488	-0.19533	-8.28966	16	19	10	3UTR		0	1
hsa-miR-4645-5p	NM_020530	OSM	ACCAGGCAAGAAATATTGT#ATATTTAAAACTTGCCTGGTT#((((((((((.........#.)))))))))).	1838	1859	1	-18.1	1	0.0444692	0.756	1.01046	0.741889	-13.2236	10	12	10	3UTR		0	1
hsa-miR-1343-5p	NM_020530	OSM	TGGGGAGCGGCCCCCGGGTGGG#CCCGTCTTGGGTCCTCGCTGCTGGCTGCTCCCCC#.(((((((((((((((((((((#)))).))))))...........))))))))))).	1620	1654	1	-37	1	0.00495519	0.368	0.499444	0.0933016	-3.79332	21	34	11	3UTR		0	1
hsa-miR-5693	NM_020530	OSM	GCAGTGGCTCTGAAATGAACTC#GGAGCCATTGCT#(((((((((((...........#))))))))))).	1684	1696	1	-20.2	1	2.59529e-05	0.456	1.09214	0.160083	-10.3988	11	12	11	3UTR		0	1
hsa-miR-11181-3p	NM_020530	OSM	AGGAGGAGGAGGTCAGGC#GCCGTTGCCCCCAGACTTCCTCCTTTC#.(((((((((((((.(((#.)))....))))))))))))).	1183	1210	1	-23.7	1	0.0969292	0.412	-0.407425	0.255013	-4.52877	16	22	13	3UTR		0	1
hsa-miR-12118	NM_020530	OSM	CAAGGAGGAGCGGGGATTAG#CCCCAGACTTCCTCCTTT#.((((((((((((((.....#)))).).)).))))))).	1191	1209	1	-20	1	0.108961	0.412	-0.244781	0.198562	-4.02637	14	18	7	3UTR		0	1
hsa-miR-619-5p	NM_004054	C3AR1	GCTGGGATTACAGGCATGAGCC#CTCAAGCCGCATCCCAGA#.(((((((....(((.((((..#)))).)))..))))))).	1725	1743	1	-21.1	1	0.0169406	0.529	0.0305518	0.00448029	-12.4968	14	18	7	3UTR		0	1
hsa-miR-3192-5p	NM_004054	C3AR1	TCTGGGAGGTTGTAGCAGTGGAA#CCACTCTCATTTCCCAGAG#(((((((((.((.((.(((((..#)))))))))))))))))).	2740	2759	1	-22.7	1	0.00341654	0.559	-0.198086	-0.170579	-6.70226	18	19	18	3UTR		0	1
hsa-miR-4728-3p	NM_004054	C3AR1	CATGCTGACCTCCCTCCTGCCCCAG#TGGAAGGAGAAAGAGGGTGGAGGATGGAGCAGCAA#..(((((..((((.((((.((((..#.))).).)))).))))))))).	2482	2517	1	-26.5	0	0.0100484	0.5	-0.540262	-0.178015	-9.18387	17	22	9	3UTR		0	1
hsa-miR-6881-3p	NM_004054	C3AR1	ATCCTCTTTCGTCCTTCCCACT#AGTATTTCAAGTGGAAGGAGAAAGAGGGTG#((((((((((.(((((.(((((#.)))))))))))))))))))).	2471	2501	1	-28.2	1	0.0238442	0.574	-0.628079	-0.18762	-6.76235	20	22	20	3UTR		0	1
hsa-miR-30a-3p	NM_138715	MSR1	CTTTCAGTCGGATGTTTGCAGC#GAATTACTGTAAACAGCCTACTGAAAA#.(((((((.((.(((((((((.#.))))))))).)).))))))).	2762	2789	1	-22.8	1	0.0365882	0.676	2.81318	3.38289	-8.19652	18	22	9	3UTR		0	1
hsa-miR-33a-5p	NM_138715	MSR1	GTGCATTGTAGTTGCATTGCA#CAATGCAAACATCTTCAGTGCAG#.(((((((.((((((((((..#))))))))....)).))))))).	2224	2247	1	-17.7	1	0.00287771	0.632	3.13083	3.17628	-4.84971	17	23	8	3UTR		0	1
hsa-miR-147a	NM_138715	MSR1	GTGTGTGGAAATGCTTCTGC#GAAGTCTCACCACACATA#((((((((....(((((...#)))))....)))))))).	2682	2700	1	-17.6	1	0.0581059	0.603	2.99041	3.1027	-12.408	13	18	8	3UTR		0	1
hsa-miR-34a-3p	NM_138715	MSR1	CAATCAGCAAGTATACTGCCCT#GGGTTGTTAATACTATATTGCTGTATGGTATATGCATGCTGATTT#.((((((((.(((((.((((..#.))))))))).)))))))).	3394	3439	1	-19.7	1	0.000442255	0.735	4.05075	3.297	-5.26888	17	20	9	3UTR		0	1
hsa-miR-106b-5p	NM_138715	MSR1	TAAAGTGCTGACAGTGCAGAT#ATTTGCATTATCAGCCTG#...((.(((((.(((((((((#))))))))).))))))).	3000	3018	1	-18.3	0	0.00948937	0.574	2.49867	2.9895	-11.7623	16	18	9	3UTR		0	1
hsa-miR-30e-3p	NM_138715	MSR1	CTTTCAGTCGGATGTTTACAGC#GAATTACTGTAAACAGCCTACTGAAAA#.(((((((.((.(((((((((.#.))))))))).)).))))))).	2762	2789	1	-22.8	1	0.0365882	0.676	2.81318	3.38289	-8.19652	18	22	9	3UTR		0	1
hsa-miR-92b-3p	NM_138715	MSR1	TATTGCACTCGTCCCGGCCTCC#GGGGGGTGGGGGGTGCGT#...(((((((..((((.(((((#))))).))))))))))).	2318	2336	1	-25.5	0	0.000276192	0.441	2.59463	2.75744	-12.6861	16	18	11	3UTR		0	1
hsa-miR-551b-5p	NM_138715	MSR1	GAAATCAAGCGTGGGTGAGACC#GTCTCACCACACA#..........(((((((((((.#)))))))).))).	2685	2698	1	-18.7	0	0.0567856	0.603	2.66859	3.24751	-21.7228	11	13	8	3UTR		0	1
hsa-miR-33b-3p	NM_138715	MSR1	CAGTGCCTCGGCAGTGCAGCCC#GGGTTGTTAATACTGTATTGCTGTATGGTATA#..(((((.((((((((((((((#))).........)))))))))))...))))).	3045	3077	1	-22.8	0	0.00284112	0.632	3.30809	2.84794	-7.27064	19	32	11	3UTR		0	1
hsa-miR-548d-3p	NM_138715	MSR1	CAAAAACCACAGTTTCTTTTGC#GCAGAAGGAAGAGTGGTTTC#...(((((((..((((((((((#))))))))))..))))))).	2243	2263	1	-21.6	0	0.000825465	0.603	2.21613	3.6112	-12.6861	17	20	10	3UTR		0	1
hsa-miR-1323	NM_138715	MSR1	TCAAAACTGAGGGGCATTTTCT#GGGATGTCTGAGATCAGTGCCTCTGGGTTG#....((((.(((((((((.(((#.)))..))))))))).)))).	3021	3051	1	-20.3	0	0.00165088	0.574	2.582	3.02137	-10.603	16	21	9	3UTR		0	1
hsa-miR-216b-5p	NM_138715	MSR1	AAATCTCTGCAGGCAAATGTGA#TGACTGCCTGCAGAA#.....((((((((((.......#.)))))))))).	2478	2493	1	-19.9	0	0.00233282	0.574	2.42792	2.72176	-13.8986	10	12	10	3UTR		0	1
hsa-miR-4279	NM_138715	MSR1	CTCTCCTCCCGGCTTC#GAAGTCAGTCAACATTTACAACCAAAGGGCGGGGGGGGGGG#(((((((((((.(((.#.))).))))))))))).	2283	2324	1	-25.5	1	0.000349066	0.426	3.73072	2.46341	-7.51743	14	17	11	3UTR		0	1
hsa-miR-3622a-5p	NM_138715	MSR1	CAGGCACGGGAGCTCAGGTGAG#CACTTGGGATGTCTGAGATCAGTGCCTA#.((((((..((.((((((....#.)))))).)).)))))).	3365	3393	1	-19.7	1	0.00136545	0.559	2.2695	2.85731	-10.5102	14	18	6	3UTR		0	1
hsa-miR-3911	NM_138715	MSR1	TGTGTGGATCCTGGAGGAGGCA#CCATCCCCAGGGCCATAG#..(((((.((((((.(((((..#)).)))))))))))))).	2411	2429	1	-22.2	0	0.0011656	0.515	3.15831	2.6462	-8.00609	16	18	14	3UTR		0	1
hsa-miR-4493	NM_138715	MSR1	AGAAGGCCTTTCCATCTCTGT#GGGGGGGTGGGGGGTGCGTCTTTA#.((((((((((((((((((.(#).))))))))))))...)))))).	2317	2341	1	-20.3	1	0.00199161	0.412	2.06693	2.81411	-3.79332	19	24	12	3UTR		0	1
hsa-miR-4652-3p	NM_138715	MSR1	GTTCTGTTAACCCATCCCCTCA#GGGGGGGTGGGGGGTGCGTCTTTAGTCCTAAAGGGACA#(((((((...(((((((((((.#)))))))))))....))...............))))).	2317	2355	1	-26.3	1	3.53386e-05	0.456	1.92192	2.8267	-8.55011	18	38	11	3UTR		0	1
hsa-miR-4703-5p	NM_138715	MSR1	TAGCAATACAGTACAAATATAGT#TACTGTATTGCTGT#(((((((((((((..........#))))))))))))).	3055	3069	1	-17.8	1	0.0174578	0.632	3.057	3.10481	-5.76291	13	14	13	3UTR		0	1
hsa-miR-4760-5p	NM_138715	MSR1	TTTAGATTGAACATGAAGTTAG#CTTTGTGTTCAGTTC#....((((((((((((((....#)))))))))))))).	2932	2947	1	-15.1	0	0.103487	0.706	2.52129	3.03825	-9.54656	14	15	14	3UTR		0	1
hsa-miR-4793-3p	NM_138715	MSR1	TCTGCACTGTGAGTTGGCTGGCT#CCAGGGCCATAGTGTAGAG#(((((((((((.(((..((((..#)))))))))))))))))).	2417	2436	1	-22.2	1	0.000285422	0.515	3.83757	2.31774	-7.51743	18	19	18	3UTR		0	1
hsa-miR-6764-3p	NM_138715	MSR1	TCTCTGGTCTTTCCTTGACAG#TGTCTTGGCCACTATGGACCAGGGAG#((((((((((..((..((((.#))))..)).......)))))))))).	1966	1992	1	-21.6	1	0.000408871	0.618	5.11571	4.2134	-11.0777	16	26	10	3UTR		0	1
hsa-miR-6833-3p	NM_138715	MSR1	TTTCTCTCTCCACTTCCTCAG#GGGGGGGTGGGGGGT#.....((((((((((((((..#)))))))))))))).	2317	2332	1	-24.1	0	0.0051657	0.456	2.2888	2.84874	-13.6656	14	15	14	3UTR		0	1
hsa-miR-7110-5p	NM_138715	MSR1	TGGGGGTGTGGGGAGAGAGAG#CTTTCTGTCTCAAACCCTGGC#(.(((((...((((.((((((#)))))).))))..))))).).	2887	2908	1	-21	0	0.0123202	0.662	3.6445	2.99887	-10.4492	16	21	6	3UTR		0	1
hsa-let-7c-5p	NM_138716	MSR1	TGAGGTAGTAGGTTGTATGGTT#ACTGTAAACAGCCTACTGA#.....((((((((((((((((.#)))))..))))))))))).	2578	2597	1	-16.8	0	0.0320533	0.676	0	0	-13.6656	16	19	11	3UTR		0	1
hsa-miR-30a-3p	NM_138716	MSR1	CTTTCAGTCGGATGTTTGCAGC#GAATTACTGTAAACAGCCTACTGAAAA#.(((((((.((.(((((((((.#.))))))))).)).))))))).	2573	2600	1	-22.8	1	0.0365882	0.676	0	0	-8.19652	18	22	9	3UTR		0	1
hsa-miR-34a-3p	NM_138716	MSR1	CAATCAGCAAGTATACTGCCCT#GGGTTGTTAATACTATATTGCTGTATGGTATATGCATGCTGATTT#.((((((((.(((((.((((..#.))))))))).)))))))).	3205	3250	1	-19.7	1	0.000442255	0.735	0	0	-5.26888	17	20	9	3UTR		0	1
hsa-miR-30e-3p	NM_138716	MSR1	CTTTCAGTCGGATGTTTACAGC#GAATTACTGTAAACAGCCTACTGAAAA#.(((((((.((.(((((((((.#.))))))))).)).))))))).	2573	2600	1	-22.8	1	0.0365882	0.676	0	0	-8.19652	18	22	9	3UTR		0	1
hsa-miR-92b-3p	NM_138716	MSR1	TATTGCACTCGTCCCGGCCTCC#GGGGGGTGGGGGGTGCGT#...(((((((..((((.(((((#))))).))))))))))).	2129	2147	1	-25.5	0	0.000276192	0.441	0	0	-12.6861	16	18	11	3UTR		0	1
hsa-miR-548d-3p	NM_138716	MSR1	CAAAAACCACAGTTTCTTTTGC#GCAGAAGGAAGAGTGGTTTC#...(((((((..((((((((((#))))))))))..))))))).	2054	2074	1	-21.6	0	0.000825465	0.603	0	0	-12.6861	17	20	10	3UTR		0	1
hsa-miR-873-5p	NM_138716	MSR1	GCAGGAACTTGTGAGTCTCCT#GGTAGACTCACAGCCGTCCA#...(((...(((((((((((.#)).)))))))))....))).	2521	2541	1	-20.5	0	0.000151457	0.574	0	0	-11.4283	14	20	9	3UTR		0	1
hsa-miR-1236-3p	NM_138716	MSR1	CCTCTTCCCCTTGTCTCTCCAG#ACAACCAAAGGGCGGGGGGGGGGGT#.(((((((((((((((......#.))))))))))))))).	2111	2136	1	-24.8	1	0.000192676	0.412	0	0	-3.79332	15	17	15	3UTR		0	1
hsa-miR-1290	NM_138716	MSR1	TGGATTTTTGGATCAGGGA#CCTTGTTCCTGTAAAATCCAT#((((((((.(((.(((((.#))))).)))...)))))))).	1280	1301	1	-18.7	1	0.142363	0.794	0	0	-6.28309	16	21	8	3UTR		0	1
hsa-miR-1246	NM_138716	MSR1	AATGGATTTTTGGAGCAGG#CTGCTCAAAAATGATTTTATTACCTTGTTCCTGTAAAATCCATTT#((((((((((.((((((((#.))))))))...)))))))))).	1258	1303	1	-20	1	0.0812362	0.794	0	0	-6.76235	18	23	10	3UTR		0	1
hsa-miR-1255b-2-3p	NM_138716	MSR1	AACCACTTTCTTTGCTCATCCA#GGGCGGGGGGGGGGGTGGG#..(((((((((((.(((.(((.#))).)))))))))))))).	2120	2139	1	-20.1	1	6.09597e-05	0.441	0	0	-5.81384	17	19	14	3UTR		0	1
hsa-miR-4267	NM_138716	MSR1	TCCAGCTCGGTGGCAC#GTGCCTCTGGGTTGT#..((((((((.(((((#))))).)))))))).	2848	2863	1	-20.3	1	0.00300758	0.574	0	0	-7.78178	13	15	8	3UTR		0	1
hsa-miR-3911	NM_138716	MSR1	TGTGTGGATCCTGGAGGAGGCA#TGCAAAATCTCCAATCCACACAT#(((((((((..((((((..(((#)))....))))))))))))))).	1669	1692	1	-23	1	0.0605927	0.691	0	0	-8.00486	18	23	15	3UTR		0	1
hsa-miR-3911	NM_138716	MSR1	TGTGTGGATCCTGGAGGAGGCA#CCATCCCCAGGGCCATAG#..(((((.((((((.(((((..#)).)))))))))))))).	2222	2240	1	-22.2	0	0.0011656	0.515	0	0	-8.00609	16	18	14	3UTR		0	1
hsa-miR-4452	NM_138716	MSR1	TTGAATTCTTGGCCTTAAGTGAT#ATTACAAAGGCCAAGGGTA#....((((((((((((..(((((#))))).)))))))))))).	1497	1516	1	-20	0	0.0161167	0.618	0	0	-9.54656	17	19	12	3UTR		0	1
hsa-miR-4652-3p	NM_138716	MSR1	GTTCTGTTAACCCATCCCCTCA#GGGGGGGTGGGGGGTGCGTCTTTAGTCCTAAAGGGACA#(((((((...(((((((((((.#)))))))))))....))...............))))).	2128	2166	1	-26.3	1	3.53386e-05	0.456	0	0	-8.55011	18	38	11	3UTR		0	1
hsa-miR-4703-5p	NM_138716	MSR1	TAGCAATACAGTACAAATATAGT#TACTGTATTGCTGT#(((((((((((((..........#))))))))))))).	2866	2880	1	-17.8	1	0.0174578	0.632	0	0	-5.76291	13	14	13	3UTR		0	1
hsa-miR-4740-5p	NM_138716	MSR1	AGGACTGATCCTCTCGGGCAGG#CCTGTTTGGGATGTCTGAGATCAGTGCCTC#((((((((((((((((((((((#))))))))))).....).))))))).))).	2825	2855	1	-25.2	1	0.000321898	0.559	0	0	-3.93757	22	30	11	3UTR		0	1
hsa-miR-4793-3p	NM_138716	MSR1	TCTGCACTGTGAGTTGGCTGGCT#CCAGGGCCATAGTGTAGAG#(((((((((((.(((..((((..#)))))))))))))))))).	2228	2247	1	-22.2	1	0.000285422	0.515	0	0	-7.51743	18	19	18	3UTR		0	1
hsa-miR-548as-5p	NM_138716	MSR1	AAAAGTAATTGCGGGTTTTGCC#GGCAAAACCTTACCTTGGAATTGGAATTACTG#...(((((((.(((((((((((#))))))))))............).))))))).	2550	2582	1	-19.9	0	0.0178528	0.691	0	0	-9.33931	18	32	10	3UTR		0	1
hsa-miR-6764-3p	NM_138716	MSR1	TCTCTGGTCTTTCCTTGACAG#TGTCTTGGCCACTATGGACCAGGGAG#((((((((((..((..((((.#))))..)).......)))))))))).	1777	1803	1	-21.6	1	0.000408871	0.618	0	0	-11.0777	16	26	10	3UTR		0	1
hsa-miR-6833-3p	NM_138716	MSR1	TTTCTCTCTCCACTTCCTCAG#GGGGGGGTGGGGGGT#.....((((((((((((((..#)))))))))))))).	2128	2143	1	-24.1	0	0.0051657	0.456	0	0	-13.6656	14	15	14	3UTR		0	1
hsa-miR-7110-5p	NM_138716	MSR1	TGGGGGTGTGGGGAGAGAGAG#CTTTCTGTCTCAAACCCTGGC#(.(((((...((((.((((((#)))))).))))..))))).).	2698	2719	1	-21	0	0.0123202	0.662	0	0	-10.4492	16	21	6	3UTR		0	1
hsa-miR-7845-5p	NM_138716	MSR1	AAGGGACAGGGAGGGTCGTGG#CAATTTTTTGCTCTTCTTGTCTTTG#.(((((((((((((((.....#.))))))))))))))).	1572	1597	1	-20.1	1	0.036771	0.735	0	0	-3.79332	15	17	15	3UTR		0	1
hsa-let-7b-5p	NM_002445	MSR1	TGAGGTAGTAGGTTGTGTGGTT#CCACATGGCCTTCTCTCCTGGTCCCTGGTGCTGTTTGGGCCTCT#.(((((((.(((((((((((..#))))))))))).))........................))))).	1279	1323	1	-21.3	1	4.83011e-05	0.426	0	0	-4.84971	18	44	11	3UTR		0	1
hsa-miR-25-3p	NM_002445	MSR1	CATTGCACTTGTCTCGGTCTGA#TCAAAGTAAAGACTGAGTCAAGGGCT#....((.((((.((((((((..#.)))))))).)))).)).	1809	1835	1	-21	0	0.000747414	0.721	0	0	-14.4371	14	18	8	3UTR		0	1
hsa-miR-198	NM_002445	MSR1	GGTCCAGAGGGGAGATAGGTTC#GGCCTTCTCTCCTGGTCCCTGGTGCTGTTTGGGCCT#(((((((((((((((.(((((.#)))))))))))))...............))))))).	1285	1321	1	-25	1	6.67968e-06	0.441	0	0	-4.17062	20	36	13	3UTR		0	1
hsa-miR-198	NM_002445	MSR1	GGTCCAGAGGGGAGATAGGTTC#GGCCCTTCACCTCTGGACA#.(((((((((((((...((((.#)))))))).))))))))).	1182	1201	1	-24.3	1	0.015071	0.529	0	0	-4.76182	17	19	9	3UTR		0	1
hsa-miR-124-5p	NM_002445	MSR1	CGTGTTCACAGCGGACCTTGAT#CAGGGTTGTTGTGAGGATC#.((.((((((((.(((((((..#))))))))))))))).)).	2740	2759	1	-20.9	0	0.000343123	0.588	0	0	-8.11448	17	19	15	3UTR		0	1
hsa-miR-433-3p	NM_002445	MSR1	ATCATGATGGGCTCCTCGGTGT#ACACAATTTAATTTATTGGGTTCTAGGAGAACTGTCATGAG#.(((((((((.(((((.((...#.)).)))))..))))))))).	1920	1961	1	-18.7	1	0.000140929	0.721	0	0	-6.6181	16	21	9	3UTR		0	1
hsa-miR-202-3p	NM_002445	MSR1	AGAGGTATAGGGCATGGGAA#TCCCATGCTCATACCTCTT#((((((((.((((((((((.#)))))))))))))))))).	1325	1344	1	-29.9	1	0.0970981	0.485	0	0	-4.99396	18	19	18	3UTR		0	1
hsa-miR-519c-5p	NM_002445	MSR1	CTCTAGAGGGAAGCGCTTTCTG#CGGGACATCCTCTGCTACCATCTCATTAAAAGGCCCTTCACCTCTGGAC#.((((((((((((.(((((...#.))))).)))).)))))))).	1151	1200	1	-23.1	1	0.0201653	0.544	0	0	-4.65016	17	21	8	3UTR		0	1
hsa-miR-519b-5p	NM_002445	MSR1	CTCTAGAGGGAAGCGCTTTCTG#CGGGACATCCTCTGCTACCATCTCATTAAAAGGCCCTTCACCTCTGGAC#.((((((((((((.(((((...#.))))).)))).)))))))).	1151	1200	1	-23.1	1	0.0201653	0.544	0	0	-4.65016	17	21	8	3UTR		0	1
hsa-miR-523-5p	NM_002445	MSR1	CTCTAGAGGGAAGCGCTTTCTG#CGGGACATCCTCTGCTACCATCTCATTAAAAGGCCCTTCACCTCTGGAC#.((((((((((((.(((((...#.))))).)))).)))))))).	1151	1200	1	-23.1	1	0.0201653	0.544	0	0	-4.65016	17	21	8	3UTR		0	1
hsa-miR-518f-5p	NM_002445	MSR1	CTCTAGAGGGAAGCACTTTCTC#AAGGCCCTTCACCTCTGGAC#.((((((((((((..((((...#))))..)))).)))))))).	1180	1200	1	-18.6	1	0.0201653	0.544	0	0	-5.38561	16	20	8	3UTR		0	1
hsa-miR-518e-5p	NM_002445	MSR1	CTCTAGAGGGAAGCGCTTTCTG#CGGGACATCCTCTGCTACCATCTCATTAAAAGGCCCTTCACCTCTGGAC#.((((((((((((.(((((...#.))))).)))).)))))))).	1151	1200	1	-23.1	1	0.0201653	0.544	0	0	-4.65016	17	21	8	3UTR		0	1
hsa-miR-522-5p	NM_002445	MSR1	CTCTAGAGGGAAGCGCTTTCTG#CGGGACATCCTCTGCTACCATCTCATTAAAAGGCCCTTCACCTCTGGAC#.((((((((((((.(((((...#.))))).)))).)))))))).	1151	1200	1	-23.1	1	0.0201653	0.544	0	0	-4.65016	17	21	8	3UTR		0	1
hsa-miR-519a-5p	NM_002445	MSR1	CTCTAGAGGGAAGCGCTTTCTG#CGGGACATCCTCTGCTACCATCTCATTAAAAGGCCCTTCACCTCTGGAC#.((((((((((((.(((((...#.))))).)))).)))))))).	1151	1200	1	-23.1	1	0.0201653	0.544	0	0	-4.65016	17	21	8	3UTR		0	1
hsa-miR-503-5p	NM_002445	MSR1	TAGCAGCGGGAACAGTTCTGCAG#GCGGGACATCCTCTGCTAC#((((((.((((...(((((((..#))))))).)))))))))).	1150	1169	1	-23	0	0.00520488	0.471	0	0	-10.974	17	19	10	3UTR		0	1
hsa-miR-1261	NM_002445	MSR1	ATGGATAAGGCTTTGGCTT#GAGACAGAGCCTTGTTCT#..(((((((((((((.(((#))).))))))))))))).	1861	1879	1	-20.5	1	8.94695e-05	0.603	0	0	-5.19005	16	18	13	3UTR		0	1
hsa-miR-2114-3p	NM_002445	MSR1	CGAGCCTCAAGCAAGGGACTT#AGTCAAGCAAAGCGATTCCTACCATACAATATAACACTTGTGTGAGGCTCT#.((((((((.(((((......#.))))).)))))))).	1543	1594	1	-22.4	1	0.000586036	0.632	0	0	-5.26888	13	16	8	3UTR		0	1
hsa-miR-3127-5p	NM_002445	MSR1	ATCAGGGCTTGTGGAATGGGAAG#CCCATTGACCTAGAGTCTTGAA#.(((((((((..((((((((...#))))))..))..))))))))).	1452	1474	1	-22.7	1	0.00196387	0.574	0	0	-9.9649	17	22	9	3UTR		0	1
hsa-miR-3190-3p	NM_002445	MSR1	TGTGGAAGGTAGACGGCCAGAGA#CTTTGGTTCCCGTGTTGTACCTGACTTCCACAT#((((((((..((((((((((((.#))))))...)))).......))..)))))))).	1252	1285	1	-23.2	1	0.0527857	0.485	0	0	-6.23647	20	33	8	3UTR		0	1
hsa-miR-3978	NM_002445	MSR1	GTGGAAAGCATGCATCCAGGGTGT#CCCTGGTGCTGTTTGGGCCTCTGCT#((((((((((.(((.((((((...#)))))))))))))).....))))).	1301	1326	1	-21.8	1	4.80674e-05	0.456	0	0	-7.4978	19	25	14	3UTR		0	1
hsa-miR-4652-3p	NM_002445	MSR1	GTTCTGTTAACCCATCCCCTCA#GGGGGAGGAACAGGGCT#((((((((...((.((((((..#)))))))))))))))).	2191	2208	1	-20.8	1	0.00368583	0.588	0	0	-9.91808	16	17	16	3UTR		0	1
hsa-miR-4661-5p	NM_002445	MSR1	AACTAGCTCTGTGGATCCTGAC#GTCTCTGGTTTTACAGAGCTAA#...((((((((((((.((.(((#)))...)).)))))))))))).	2111	2133	1	-21.7	0	0.00118136	0.647	0	0	-6.74759	17	22	12	3UTR		0	1
hsa-miR-4731-3p	NM_002445	MSR1	CACACAAGTGGCCCCCAACACT#CACTTGTGTGA#((((((((((............#)))))))))).	1577	1588	1	-16.3	1	0.000427845	0.618	0	0	-13.2236	10	11	10	3UTR		0	1
hsa-miR-4793-3p	NM_002445	MSR1	TCTGCACTGTGAGTTGGCTGGCT#GCCATGCTTTGCTCATGCGCAA#..(((.(.((((((.(((((((.#)))).)))..))))))).))).	1640	1662	1	-21.2	0	0.000129173	0.603	0	0	-9.90704	17	22	7	3UTR		0	1
hsa-miR-664b-3p	NM_002445	MSR1	TTCATTTGCCTCCCAGCCTACA#GTGGGTTGGGCGGGACAT#......(((((((((((((((.#)))))))))).))).)).	1141	1159	1	-23.1	0	0.0013967	0.441	0	0	-15.5666	15	18	10	3UTR		0	1
hsa-miR-6752-5p	NM_002445	MSR1	GGGGGGTGTGGAGCCAGGGGGC#GCTCCCATGCTCATACCTCTT#.((((((((.((((..((((((#))))))..)))))))))))).	1323	1344	1	-28.2	1	0.0970981	0.485	0	0	-6.00433	18	21	12	3UTR		0	1
hsa-miR-6752-5p	NM_002445	MSR1	GGGGGGTGTGGAGCCAGGGGGC#CCCCCAGCCTGGACACCTCTCA#(((((((((((.((..(((((.#))))).))))..))))))))).	1384	1406	1	-27.1	1	0.00705836	0.368	0	0	-8.25288	18	22	9	3UTR		0	1
hsa-miR-6823-3p	NM_002445	MSR1	TGAGCCTCTCCTTCCCTCCAG#CTGGGGGAGGAACAGGGCTGGA#(.(((((.(((.((((.((((#)))))))))))...))))).).	2189	2211	1	-24.1	0	0.00584518	0.603	0	0	-10.7617	17	22	11	3UTR		0	1
hsa-miR-6824-3p	NM_002445	MSR1	TCTCTGGTCTTGCCACCCCAG#CTGGGGGAGGAACAGGGCTGGAT#..((((((((((((.((((((#))))))..))..)))))))))).	2189	2212	1	-25.1	1	0.00647959	0.603	0	0	-5.69245	18	23	10	3UTR		0	1
hsa-miR-6880-5p	NM_002445	MSR1	TGGTGGAGGAAGAGGGCAGCTC#GGGCTGCTCCAACCAGTCCTCAGTTCTCTGCCAC#((((((((((.(((((((((((#)))))))..........))))..)))))))))).	1419	1453	1	-27.4	1	0.00168827	0.471	0	0	-6.76235	21	34	10	3UTR		0	1
hsa-miR-7845-5p	NM_002445	MSR1	AAGGGACAGGGAGGGTCGTGG#CATGGCCTTCTCTCCTGGTCCCTG#.(((((((((((((((((((.#)))))))))))))....)))))).	1282	1306	1	-30	1	0.0110039	0.412	0	0	-3.79332	19	24	13	3UTR		0	1
hsa-miR-8055	NM_002445	MSR1	CTTTGAGCACATGAGCAGACGGA#TCCCTGGTGCTGTTTGGGCCTCTGCTCCCATGCTCAT#...((((((...(((((((.((.#.)))))))))...)))))).	1300	1337	1	-23	0	0.0121379	0.471	0	0	-13.9286	15	20	9	3UTR		0	1
hsa-miR-11181-3p	NM_002445	MSR1	AGGAGGAGGAGGTCAGGC#GCACAACTGACTTCCAAGATCCTTTTGTGACTCCTCCA#.(((((((((((((((..#.)))))))))................)))))).	1209	1247	1	-23.8	1	0.0314714	0.544	0	0	-3.79332	15	33	9	3UTR		0	1
hsa-let-7c-5p	NM_001363744	MSR1	TGAGGTAGTAGGTTGTATGGTT#ACTGTAAACAGCCTACTGA#.....((((((((((((((((.#)))))..))))))))))).	2827	2846	1	-16.8	0	0.0320533	0.676	0	0	-13.6656	16	19	11	3UTR		0	1
hsa-miR-30a-3p	NM_001363744	MSR1	CTTTCAGTCGGATGTTTGCAGC#GAATTACTGTAAACAGCCTACTGAAAA#.(((((((.((.(((((((((.#.))))))))).)).))))))).	2822	2849	1	-22.8	1	0.0365882	0.676	0	0	-8.19652	18	22	9	3UTR		0	1
hsa-miR-34a-3p	NM_001363744	MSR1	CAATCAGCAAGTATACTGCCCT#GGGTTGTTAATACTATATTGCTGTATGGTATATGCATGCTGATTT#.((((((((.(((((.((((..#.))))))))).)))))))).	3454	3499	1	-19.7	1	0.000442255	0.735	0	0	-5.26888	17	20	9	3UTR		0	1
hsa-miR-30e-3p	NM_001363744	MSR1	CTTTCAGTCGGATGTTTACAGC#GAATTACTGTAAACAGCCTACTGAAAA#.(((((((.((.(((((((((.#.))))))))).)).))))))).	2822	2849	1	-22.8	1	0.0365882	0.676	0	0	-8.19652	18	22	9	3UTR		0	1
hsa-miR-92b-3p	NM_001363744	MSR1	TATTGCACTCGTCCCGGCCTCC#GGGGGGTGGGGGGTGCGT#...(((((((..((((.(((((#))))).))))))))))).	2378	2396	1	-25.5	0	0.000276192	0.441	0	0	-12.6861	16	18	11	3UTR		0	1
hsa-miR-548d-3p	NM_001363744	MSR1	CAAAAACCACAGTTTCTTTTGC#GCAGAAGGAAGAGTGGTTTC#...(((((((..((((((((((#))))))))))..))))))).	2303	2323	1	-21.6	0	0.000825465	0.603	0	0	-12.6861	17	20	10	3UTR		0	1
hsa-miR-873-5p	NM_001363744	MSR1	GCAGGAACTTGTGAGTCTCCT#GGTAGACTCACAGCCGTCCA#...(((...(((((((((((.#)).)))))))))....))).	2770	2790	1	-20.5	0	0.000151457	0.574	0	0	-11.4283	14	20	9	3UTR		0	1
hsa-miR-1236-3p	NM_001363744	MSR1	CCTCTTCCCCTTGTCTCTCCAG#ACAACCAAAGGGCGGGGGGGGGGGT#.(((((((((((((((......#.))))))))))))))).	2360	2385	1	-24.8	1	0.000192676	0.412	0	0	-3.79332	15	17	15	3UTR		0	1
hsa-miR-1290	NM_001363744	MSR1	TGGATTTTTGGATCAGGGA#CCTTGTTCCTGTAAAATCCAT#((((((((.(((.(((((.#))))).)))...)))))))).	1529	1550	1	-18.7	1	0.142363	0.794	0	0	-6.28309	16	21	8	3UTR		0	1
hsa-miR-1246	NM_001363744	MSR1	AATGGATTTTTGGAGCAGG#CTGCTCAAAAATGATTTTATTACCTTGTTCCTGTAAAATCCATTT#((((((((((.((((((((#.))))))))...)))))))))).	1507	1552	1	-20	1	0.0812362	0.794	0	0	-6.76235	18	23	10	3UTR		0	1
hsa-miR-1255b-2-3p	NM_001363744	MSR1	AACCACTTTCTTTGCTCATCCA#GGGCGGGGGGGGGGGTGGG#..(((((((((((.(((.(((.#))).)))))))))))))).	2369	2388	1	-20.1	1	6.09597e-05	0.441	0	0	-5.81384	17	19	14	3UTR		0	1
hsa-miR-4267	NM_001363744	MSR1	TCCAGCTCGGTGGCAC#GTGCCTCTGGGTTGT#..((((((((.(((((#))))).)))))))).	3097	3112	1	-20.3	1	0.00300758	0.574	0	0	-7.78178	13	15	8	3UTR		0	1
hsa-miR-3911	NM_001363744	MSR1	TGTGTGGATCCTGGAGGAGGCA#TGCAAAATCTCCAATCCACACAT#(((((((((..((((((..(((#)))....))))))))))))))).	1918	1941	1	-23	1	0.0605927	0.691	0	0	-8.00486	18	23	15	3UTR		0	1
hsa-miR-3911	NM_001363744	MSR1	TGTGTGGATCCTGGAGGAGGCA#CCATCCCCAGGGCCATAG#..(((((.((((((.(((((..#)).)))))))))))))).	2471	2489	1	-22.2	0	0.0011656	0.515	0	0	-8.00609	16	18	14	3UTR		0	1
hsa-miR-4452	NM_001363744	MSR1	TTGAATTCTTGGCCTTAAGTGAT#ATTACAAAGGCCAAGGGTA#....((((((((((((..(((((#))))).)))))))))))).	1746	1765	1	-20	0	0.0161167	0.618	0	0	-9.54656	17	19	12	3UTR		0	1
hsa-miR-4652-3p	NM_001363744	MSR1	GTTCTGTTAACCCATCCCCTCA#GGGGGGGTGGGGGGTGCGTCTTTAGTCCTAAAGGGACA#(((((((...(((((((((((.#)))))))))))....))...............))))).	2377	2415	1	-26.3	1	3.53386e-05	0.456	0	0	-8.55011	18	38	11	3UTR		0	1
hsa-miR-4703-5p	NM_001363744	MSR1	TAGCAATACAGTACAAATATAGT#TACTGTATTGCTGT#(((((((((((((..........#))))))))))))).	3115	3129	1	-17.8	1	0.0174578	0.632	0	0	-5.76291	13	14	13	3UTR		0	1
hsa-miR-4740-5p	NM_001363744	MSR1	AGGACTGATCCTCTCGGGCAGG#CCTGTTTGGGATGTCTGAGATCAGTGCCTC#((((((((((((((((((((((#))))))))))).....).))))))).))).	3074	3104	1	-25.2	1	0.000321898	0.559	0	0	-3.93757	22	30	11	3UTR		0	1
hsa-miR-4793-3p	NM_001363744	MSR1	TCTGCACTGTGAGTTGGCTGGCT#CCAGGGCCATAGTGTAGAG#(((((((((((.(((..((((..#)))))))))))))))))).	2477	2496	1	-22.2	1	0.000285422	0.515	0	0	-7.51743	18	19	18	3UTR		0	1
hsa-miR-548as-5p	NM_001363744	MSR1	AAAAGTAATTGCGGGTTTTGCC#GGCAAAACCTTACCTTGGAATTGGAATTACTG#...(((((((.(((((((((((#))))))))))............).))))))).	2799	2831	1	-19.9	0	0.0178528	0.691	0	0	-9.33931	18	32	10	3UTR		0	1
hsa-miR-6764-3p	NM_001363744	MSR1	TCTCTGGTCTTTCCTTGACAG#TGTCTTGGCCACTATGGACCAGGGAG#((((((((((..((..((((.#))))..)).......)))))))))).	2026	2052	1	-21.6	1	0.000408871	0.618	0	0	-11.0777	16	26	10	3UTR		0	1
hsa-miR-6833-3p	NM_001363744	MSR1	TTTCTCTCTCCACTTCCTCAG#GGGGGGGTGGGGGGT#.....((((((((((((((..#)))))))))))))).	2377	2392	1	-24.1	0	0.0051657	0.456	0	0	-13.6656	14	15	14	3UTR		0	1
hsa-miR-7110-5p	NM_001363744	MSR1	TGGGGGTGTGGGGAGAGAGAG#CTTTCTGTCTCAAACCCTGGC#(.(((((...((((.((((((#)))))).))))..))))).).	2947	2968	1	-21	0	0.0123202	0.662	0	0	-10.4492	16	21	6	3UTR		0	1
hsa-miR-7845-5p	NM_001363744	MSR1	AAGGGACAGGGAGGGTCGTGG#CAATTTTTTGCTCTTCTTGTCTTTG#.(((((((((((((((.....#.))))))))))))))).	1821	1846	1	-20.1	1	0.036771	0.735	0	0	-3.79332	15	17	15	3UTR		0	1
hsa-miR-199b-5p	NM_022147	RTP4	CCCAGTGTTTAGACTATCTGTTC#GTAGAATAAACACTGGT#.((((((((((..((((......#))))..)))))))))).	908	925	1	-17.5	1	0.00407819	0.588	0.685808	0.0777489	-8.42926	14	17	10	3UTR		0	1
hsa-miR-452-5p	NM_022147	RTP4	AACTGTTTGCAGAGGAAACTGA#GGTTTCCTAGCCATCCTCTGAAAACAGTA#.(((((((.(((((((......#.))))))).))))))).	922	951	1	-20.3	1	0.0449871	0.647	0.977356	0.11386	-4.84971	14	17	7	3UTR	MIRT513420	0	1
hsa-miR-6069	NM_022147	RTP4	GGGCTAGGGCCTGCTGCCCCC#GCAGAAGGAACCAGCCCTGCCTGCACATGGCTTTAGCCCA#(((((((((((((.(((....#.))))).))))))))))).	1394	1434	1	-26	1	0.000203123	0.471	0.0808637	-0.0906469	-4.79441	16	19	11	3UTR		0	1
